1 **Structural insights into the mechanism of the human SGLT2–MAP17 glucose**  
2 **transporter**

3

4 Masahiro Hiraizumi<sup>1,4,†,\*</sup>, Tomoya Akashi<sup>2,4</sup>, Kouta Murasaki<sup>1</sup>, Hiroyuki Kishida<sup>1</sup>,  
5 Taichi Kumanomidou<sup>1</sup>, Nao Torimoto<sup>1</sup>, Osamu Nureki<sup>3,\*</sup>, and Ikuko Miyaguchi<sup>1,\*</sup>

6

7 <sup>1</sup>Discovery Technology Laboratories Sohyaku Innovative Research Division, Mitsubishi  
8 Tanabe Pharma Co., LTD., 1000, Kamoshida-cho, Aoba-ku, Yokohama 227-0033, Japan

9 <sup>2</sup>DMPK Research Laboratories Sohyaku Innovative Research Division, Mitsubishi  
10 Tanabe Pharma Co., LTD., 1000, Kamoshida-cho, Aoba-ku, Yokohama 227-0033, Japan

11 <sup>3</sup>Department of Biological Sciences, Graduate School of Science, The University of  
12 Tokyo, 7-3-1 Hongo, Bunkyo-ku, Tokyo 113-0033, Japan

13 <sup>4</sup>Co-first authors

14 \*Corresponding authors

15 Masahiro Hiraizumi: 0000-0002-4340-2937

16 Osamu Nureki: 0000-0003-1813-7008

17 Ikuko Miyaguchi: 0000-0003-0021-7296

18 <sup>†</sup>Current address: Department of Chemistry and Biotechnology, Graduate School of  
19 Engineering, The University of Tokyo

20 **Abstract**

21 Selective sodium-glucose cotransporter 2 (SGLT2) plays an important role in glucose  
22 reabsorption. SGLT2 inhibitors suppress glucose reabsorption from the kidneys, thus  
23 reducing blood glucose levels in type 2 diabetes patients. We and other groups have  
24 developed several SGLT2 inhibitors starting from a natural product, phlorizin, but their  
25 action mechanisms remain unknown. Here, we elucidated the physiological  
26 hSGLT2–MAP17 complex structures bound to five SGLT2 inhibitors using  
27 single-particle cryo-electron microscopy. Canagliflozin, dapagliflozin, TA-1887, and  
28 sotagliflozin were bound in the outward-facing structure, whereas phlorizin was bound  
29 in the inward-open structure. The phlorizin–hSGLT2 interaction biochemically  
30 exhibited biphasic binding. Phlorizin weakly binds, via the phloretin motif, from its  
31 intracellular side near the Na<sup>+</sup>-binding site, while strongly interacts from its  
32 extracellular side. Unexpectedly, bound Na<sup>+</sup> stabilizes the outward-open conformation,  
33 while its release allows the transporter to adopt inward-open state. Our results first  
34 visualized the Na<sup>+</sup>-binding and inward-open conformation of hSGLT2–MAP17,  
35 clarifying the unprecedented Na<sup>+</sup>-dependent sugar transport mechanism with MAP17  
36 acting as a scaffold, and may pave the way for development of next-generation SGLT  
37 inhibitors.

38

39 **Introduction**

40 Type 2 diabetes mellitus is characterized by persistent hyperglycemia caused by  
41 inadequate insulin action. Chronic high blood sugar level damages blood vessels,  
42 causing serious health problems, such as nephropathy and cardiovascular disease. The  
43 primary treatment for diabetes is blood glucose control; drugs such as selective

44 sodium-glucose cotransporter (SGLT1 and 2; also known as SLC5A1 and 2) inhibitors<sup>1</sup>  
45 hold great promise for reducing blood glucose levels. Human SGLT1 and SGLT2 are  
46 responsible for the reabsorption of plasma glucose in the proximal tubules after  
47 filtration through the renal capillaries<sup>2</sup>. SGLT2 is located in the S1 and S2 segments of  
48 the proximal tubule and absorbs 90% of plasma glucose; SGLT1, which has higher  
49 glucose affinity, is located in the S3 segment of the proximal tubule and absorbs the  
50 remaining 10%<sup>3</sup>.

51 SGLT2, a transmembrane protein with 14 helices (Fig. 1a) and expressed  
52 specifically in the kidneys, has 60% sequence homology to SGLT1, which is expressed  
53 in the small intestine as well. SGLT2 inhibitors that suppress glucose reabsorption and  
54 promote urinary excretion are considered a promising therapeutic tool to manage blood  
55 glucose levels in type 2 diabetes patients. SGLT2 inhibitor development initially  
56 focused on the natural product phlorizin (Figs 3b)<sup>4</sup>, an O-glucoside that is hydrolyzed  
57 by  $\beta$ -glucosidase in the intestine, making oral administration difficult owing to its poor  
58 metabolic stability. This was replaced by N- or C-glucosides, with better metabolic  
59 stability. C-glucosides, including canagliflozin, dapagliflozin, and empagliflozin, are  
60 marketed as approved drugs in USA, Japan and many countries (Figs 1b, 2g, h)<sup>5</sup>.  
61 SGLT2 inhibitors have ushered in a new phase of diabetes treatment, providing many  
62 benefits including, reduced risk of heart failure and kidney protection<sup>6-9</sup>. It was initially  
63 thought that rare mutations in the Na<sup>+</sup>-glucose cotransporter gene *SLC5A1* can cause  
64 lethal glucose-galactose malabsorption and that inhibitors with high specificity for  
65 SGLT2 over SGLT1 were necessary to treat diabetes. However, SGLT1 inhibition in the  
66 gastrointestinal tract leads to postprandial glucose excursion control and gastrointestinal  
67 hormone secretion<sup>10</sup>. Therefore, SGLT1 and SGLT2 dual inhibitors (e.g., sotagliflozin

68 and LX-2761; Fig. 2e) are currently being developed for the treatment of diabetes<sup>9,11</sup>.

69           SGLT1 and SGLT2 belong to the LeuT transporter family and are conserved  
70 in all bacterial and animal taxa, with six isoforms in humans<sup>12,13</sup>. Structural homology  
71 modeling studies have been conducted using SGLT from *Vibrio parahaemolyticus*  
72 (vSGLT) and similar protein structures, such as SiaT<sup>14,15</sup>, because of the difficulties in  
73 protein preparation and structural analysis. A functional model of SGLT2 glucose  
74 uptake has been proposed: SGLT2 undergoes a conformational change to an  
75 outward-facing conformation by binding to a single Na<sup>+</sup> ion (at Na2 site<sup>16</sup>) before  
76 binding to the substrate, depending on Na<sup>+</sup> concentration gradient across the plasma  
77 membrane, which then promotes glucose binding. Subsequently, Na<sup>+</sup> and sugars are  
78 incorporated into the cell in an inward-open conformation<sup>3,12,13</sup>. In contrast, SGLT1  
79 requires two Na<sup>+</sup> ions (at Na2 and Na3 sites) for glucose transport, which probably  
80 affects its glucose affinity<sup>16</sup>. The structural understanding of the human SGLT family  
81 was advanced by the cryo-electron microscopy (cryo-EM) structures of SGLT1 and  
82 SGLT2. The structure of the hSGLT1 apo-form with consensus stabilizing mutations  
83 and molecular dynamics calculations, revealed the mechanism of glucose binding and  
84 selectivity and water permeability<sup>17</sup>. The activity of hSGLT2, whose gene has long been  
85 difficult to clone, is greatly enhanced by the co-expression of MAP17 (PDZK1P1), an  
86 essential auxiliary subunit of hSGLT2<sup>18</sup>. Determination of the hSGLT2 structure via  
87 MAP17 tethering and the introduction of several mutations revealed that it is bound by  
88 empagliflozin in an outward-facing conformation<sup>19</sup>. Furthermore, introduction of  
89 MAP17 tethering and several mutations in hSGLT1 revealed that the dual inhibitor  
90 LX2761 was bound in the outward conformation of hSGLT1<sup>20</sup>. The role of amino acid  
91 residues in the binding of SGLT inhibitors in these two outward conformations was



92 discussed. However, the function of Na<sup>+</sup> remains unknown, because these previous  
93 studies did not detect Na<sup>+</sup>, which should bind to hSGLT before binding to the substrate.  
94 Regarding the binding mode of inhibitors, only C-glucoside inhibitors have been shown  
95 to bind in the outward conformation, while the binding mode of O- and N-glucoside  
96 type inhibitors, including phlorizin, still needs to be elucidated. Moreover, the  
97 conformational changes of SGLT2 between the outward and inward conformations as  
98 well as the role of MAP17 as a scaffold have yet been unclarified.

99           Here, we performed cryo-EM single-particle analyses to determine the  
100 structure of the genuine hSGLT2–MAP17 complexes with five inhibitors (canagliflozin,  
101 dapagliflozin, TA-1887, sotagliflozin, and phlorizin). This characterization of  
102 Na<sup>+</sup>-binding outward-facing structures and inward-open structures with MAP17 as a  
103 scaffold, together with transport and binding assays, significantly clarifies the molecular  
104 features of hSGLT2–MAP17, SGLT2 inhibition, and sugar transport, which helps  
105 achievement of glycemic control in patients.

106

## 107 **Results and discussion**

### 108 *Structural determination of the hSGLT2–MAP17 heterodimer*

109 We performed cryo-EM analysis of hSGLT2 to elucidate its inhibitory mechanism. To  
110 obtain a stable and homogeneous sample, we first examined, by fluorescence-detection  
111 size-exclusion chromatography (FSEC)<sup>21</sup>, the expression of hSGLT2 whose N or C  
112 terminus was fused with enhanced green fluorescent protein (EGFP). However, we were  
113 unable to detect hSGLT2 expression (Fig. 1c); given that its N-terminus is exposed to  
114 the extracellular side, we hypothesized that N-terminal fusion of a signal sequence and  
115 super folder GFP (sfGFP) would improve the protein expression<sup>22</sup>. Fusing the human

116 trypsinogen 1-derived signal peptide and sfGFP to the hSGLT2 N-terminus revealed a  
117 peak, indicating that hSGLT2 can be solubilized by detergents (Fig. 1c). Co-expression  
118 of MAP17 and hSGLT2 caused a high molecular-weight shift in FSEC, suggesting  
119 heterodimer-complex formation. LC-MS/MS confirmed that signal peptides and sfGFP  
120 fused with hSGLT2–MAP17-expressing cells could take up  
121  $\alpha$ -methyl-D-glucopyranoside ( $\alpha$ -MG; Fig. 1b); this uptake was sensitive to canagliflozin  
122 (Fig. 1d). We used LC-MS/MS to determine whether the prepared membrane fractions  
123 maintained their inhibitor-binding activity, verifying the binding of multiple inhibitors  
124 to hSGLT2 (Fig. 1e; Supplementary Fig. 1c). Membrane fraction of  
125 hSGLT2–MAP17-expressing cells was solubilized with N-dodecyl  $\beta$ -D-maltoside  
126 (DDM) micelles in the presence of SGLT2 inhibitors, purified using GFP  
127 nanobody-affinity chromatography, followed by cleavage of sfGFP using protease, and  
128 subjected to gel-filtration column chromatography (Supplementary Fig. 1a, b).

129           Purified hSGLT2–MAP17 complexes were subjected to cryo-EM  
130 single-particle analyses with five inhibitors (canagliflozin, dapagliflozin, TA-1887,  
131 sotagliflozin, and phlorizin; Supplementary Figs 3–6, 8). The acquired movies were  
132 motion-corrected and processed in RELION<sup>23,24</sup> providing cryo-EM maps at overall  
133 resolutions of 2.6–3.3 Å, according to the gold-standard Fourier shell correlation (FSC)  
134 = 0.143 criterion (Supplementary Data Table 1). All of the potential maps contained  
135 disordered regions but were sufficient for building structural models of proteins and  
136 inhibitors (Supplementary Figs 7, 9). The overall structure exhibits a LeuT fold  
137 comprising 14 membrane-spanning helices (TM0–TM13). Helices TM1–5 and TM6–10  
138 formed an inverted repeating structure (Fig. 1a). N-glycan, attached to N250 of hSGLT2,  
139 was identified (Supplementary Figs 7, 9). Canagliflozin, dapagliflozin, sotagliflozin,

140 and TA-1887 were found to bind to the outward-facing conformation, whereas phlorizin  
141 was found to bind to the inward-open conformation. Because of their high flexibility,  
142 the N-terminal loop of hSGLT2 (15–20 amino acids), the IL6 loop between TM12 and  
143 TM13, and the extracellular or intracellular region of MAP17, were not visible in either  
144 structure. The inward-open structure does not exhibit density for IL0 between TM0 and  
145 TM1. In MAP17, a single transmembrane helix interacts with TM13 of hSGLT2,  
146 consistent with the published interaction between MAP17 and hSGLT2<sup>19</sup>. The  
147 extracellular half interacts closely with hydrophobic residues and lipids, while the  
148 intracellular half does not interact with hSGLT2 (Fig. 1f; Supplementary Fig. 10).

149

#### 150 ***The inhibitor-bound hSGLT2 structure and the roles of the Na<sub>2</sub> site***

151 The C-glucoside inhibitors (canagliflozin, dapagliflozin, and sotagliflozin), and the  
152 N-glucoside TA-1887, are bound to the central hydrophobic cavity of the topologically  
153 inverted repeats (IRs) (TM1, TM2, TM3, TM6, and TM10; Figs 1a, 2a) of hSGLT2 in  
154 outward-facing conformation. This cavity was negatively charged, favoring the binding  
155 of positively charged ions such as Na<sup>+</sup>. The binding mode was the same as that in the  
156 recently reported SGLT2-empagliflozin structure<sup>19</sup>; for the main chain, with  
157 root-mean-square deviation (RMSD) ranging from 0.66 to 0.85 Å.

158 SGLT2 couples the transport of one Na<sup>+</sup> ion and one glucose molecule. The  
159 Na<sup>+</sup>-binding Na<sub>2</sub> site, which is conserved in many LeuT-fold transporters, was located  
160 near the middle bend of TM1 (Fig. 2b). In SGLT2, the Na<sub>2</sub> site is thought to be formed  
161 by the backbone carbonyls of A73, I76, and A389 and the side chain oxygens of S392  
162 and S393 (Fig. 2b), based on the vSGLT<sup>15</sup> and SiaT<sup>25</sup> alignment (Supplementary Fig. 2).  
163 The density corresponding to Na<sup>+</sup> at the Na<sub>2</sub> site was confirmed in all four

164 outward-facing structures studied here (Supplementary Fig. 11). As predicted from the  
165 alignment, Na<sup>+</sup> interacts with A73 and I76 of TM1 and with A389, S392, and S393 of  
166 TM8, resulting in a trigonal bipyramidal form (Fig. 2b). Thus, TM1 and TM8 are  
167 connected by Na<sup>+</sup> and form part of the substrate-binding site. In the outward-facing  
168 structure, this connection not only brought TM1 and TM8 closer together but also  
169 allowed the entire outer region of the glucose-binding site, such as TM5, to move  
170 outward, causing the inward-open to outward-facing conformational change (Fig. 2c).  
171 The binding affinity of canagliflozin to hSGLT2 was lower in the Na<sup>+</sup> absent conditions  
172 (Fig. 2d, Supplementary Data Table 2). Therefore, Na<sup>+</sup> binds to hSGLT2 before the  
173 substrate or inhibitors binding, allosterically stabilizing the outward-facing structure.  
174 Our current findings first clarified the role of sodium ions in the transport state  
175 exchange. This is consistent with the fact that, in SGLT1, substitutions of S392 and  
176 S393 at the Na2 site significantly reduced glucose uptake<sup>26</sup>.

177

### 178 ***Implication of the role of Na3 site of SGLT1***

179 SGLT1 requires two Na<sup>+</sup> ions for sugar transport and has an Na3 site in addition to the  
180 Na2 site<sup>3</sup>. In SGLT2, the region corresponding to SGLT1 Na3 site, located on the  
181 cytoplasmic side and away from the glucose-binding pocket, is occluded by the side  
182 chain carboxyl group of D201 in TM5 and the backbone carbonyls of S392, S393, A395,  
183 and S396 in TM8 (Fig. 3c and Sup. Fig. 2 and 11b). In SGLT1, the residue  
184 corresponding to A395 in hSGLT2 is replaced by Thr, which probably contributes to  
185 Na<sup>+</sup> binding<sup>17</sup>. This is consistent with the fact that no density corresponding to Na<sup>+</sup> was  
186 observed at the Na3 site in the present hSGLT2 structures (Supplementary Fig. 11b).

187                   It has been proposed that, as at the Na<sub>2</sub> site, Na<sup>+</sup> at the Na<sub>3</sub> site binds before  
188 substrate binding and is taken up by the cell before the substrate<sup>14</sup>. In the present  
189 outward-facing structure of hSGLT2, the region corresponding to SGLT1 Na<sub>3</sub> site is  
190 located very close to Na<sub>2</sub> site so as to partially share the same amino acid residues,  
191 suggesting that the Na<sub>3</sub> site, in addition to Na<sub>2</sub> site, of SGLT1 also stabilizes the  
192 outward-open, substrate-binding structure by connecting TM1 to TM5, as Na<sub>2</sub> connects  
193 TM1 and TM8 in SGLT2. Taken together, this may contribute to the higher affinity of  
194 SGLT1 for its substrate<sup>16</sup> but its slower turnover relative to SGLT2<sup>27</sup>.

195

#### 196 *The hSGLT2 outward-facing conformation in complex with inhibitors*

197 SGLT2 inhibitors were composed of glucose and aglycone moieties (Fig. 1b). The  
198 aglycone moiety comprises two aromatic rings that bend at the methylene bridge and  
199 extend toward the extracellular space (Fig. 2a, b). The glucose moiety of all gliflozin  
200 inhibitors stacks with the aromatic side chain of the inner gate, Y290. The hydroxyl  
201 groups of the glucose moiety form hydrogen bonds in the side chains of N75, H80, E99,  
202 S287, W291, K321, and Q457, and in the main chain carbonyl group of F98 (Fig. 2b);  
203 these residues were conserved in SGLT1 (Supplementary Fig. 2). A water molecule-like  
204 density was observed near S460 in the structures of canagliflozin, dapagliflozin, and  
205 TA-1887 (Fig. 2b and Supplementary Fig. 7). It has been reported that the  
206 corresponding T460 mutant of SGLT1 has reduced sugar transport activity<sup>28</sup>. Therefore,  
207 these S460-bound water molecules may also participate in D-glucose transport in  
208 hSGLT2.

209                   The IC<sub>50</sub> values of the five compounds for hSGLT2 were 1–6 nM, with little  
210 difference, while sotagliflozin, an SGLT1/2 dual inhibitor, had >10-fold stronger

211 activity toward SGLT1 (IC<sub>50</sub> of 40 nM) than the other inhibitors<sup>6</sup>. Sotagliflozin has a  
212 methylsulfanyl group at C5 of glucose, whereas dapagliflozin has a hydroxymethyl  
213 group which has a hydrogen bonding interaction with Gln457 and a water  
214 molecule-mediated interaction with S460 (Fig. 2e, g, Supplementary Fig. 7). In SGLT1,  
215 S460 of hSGLT2 near C5 was replaced by Thr, V286 by Leu, and L283 by Met, causing  
216 the inhibitor-subtype selectivity<sup>19</sup>.

217 In all of the gliflozin inhibitors, the central aromatic ring is exposed to the  
218 hydrophobic cavity formed by TM1, TM3, and TM10 (Figs. 2e-h): in TA-1887, this is a  
219 benzylindole ring, which extends into the hydrophobic cavity (Fig. 2f). The  
220 hydrophobic substituents at the para position affect hSGLT2 inhibitory activity<sup>29,30</sup>, and  
221 are all located at approximately the same position (Fig. 2a, b, and e-h). V157, located in  
222 TM3 in hSGLT2, is replaced by A160, smaller than Val, in hSGLT1. This site is  
223 potentially selective for hSGLT2, because the hydrophobic pocket sizes should be  
224 different. Molecular dynamics simulation frames in the hSGLT1 with mizagliflozin  
225 showed that A160 is important for the selectivity, which is consistent with the present  
226 results<sup>31</sup>.

227 Distal aromatic rings form a long hydrophobic aglycon tail that extends into  
228 the extracellular vestibule. In all gliflozins, each tail formed a T-shaped  $\pi$ - $\pi$  stacking  
229 with F98 of TM2 and was surrounded by hydrophobic amino acids such as Leu84 of  
230 TM1, V95 of TM2, and F453 of TM10 (Fig. 2b, e-h). Canagliflozin extends with  
231 fluorophenyl via a thiophene ring, forming a hydrophobic interaction with the  
232 extracellular vestibule (Fig. 2b). Structure-activity relationship studies during the  
233 development of canagliflozin showed that its inhibitory activity increases with furan  
234 replaced by thiophene in the center<sup>25</sup>, suggesting that this moiety should be hydrophobic.

235 Thus, F98 and F453 are suggested to play important roles in the inhibitory action. It has  
236 been reported that SGLT1 has I98 at the position corresponding to V95 in hSGLT2 TM2,  
237 and that V95I reduced the inhibitory activity of empagliflozin in hSGLT2<sup>19</sup>. The distal  
238 aromatic rings also contribute to the selectivity between hSGLT1 and hSGLT2<sup>8</sup>.

239

240 ***High concentration phlorizin fixes hSGLT2 in the inward-open state.***

241 Unexpectedly, phlorizin was found to bind to TM1, TM5, and TM8 in an inward-open  
242 structure (Fig. 3a), in contrast to the above gliflozins. This binding site is located near  
243 the Na2 site, where sodium ions bind to the outward-facing structure (Fig. 2b). The  
244 corresponding site is occluded in the inward-facing state of vSGLT and SGLT1  
245 (Supplementary Fig. 12)<sup>15,17</sup>, and a PEG molecule was observed in the same location in  
246 the inward-open structure of vSGLT (Supplementary Fig. 12)<sup>14</sup>. The glucose moiety of  
247 phlorizin is bound to the bending site of the intracellular side of TM1, whereas the  
248 aglycon moiety, connected to the glucose moiety via an ether bond, is surrounded by the  
249 side chain of A69, S70, A73 and S74 of TM1, D201 of TM5, and R300 of TM6,  
250 extending toward the lipid membrane (Fig. 3c). The ether bond is unique to phlorizin,  
251 whereas the central aromatic ring of gliflozins connects directly to the glucose moiety,  
252 causing rigidity that prevents binding to the inward-opening structure.

253           The binding of phlorizin to the hSGLT2 expressing membrane fraction at up  
254 to 5000 nM did not saturate and exhibit biphasic kinetics, indicating that phlorizin has  
255 two binding sites on hSGLT2 (high- and low-affinity sites; Fig. 3d–f). Similarly, the  
256 binding of [<sup>3</sup>H]phlorizin exhibits biphasic binding in rat renal plasma membrane<sup>33</sup>. In  
257 whole-cell clamp experiments, hSGLT2 inhibitors, including phlorizin, achieve  
258 inhibition by acting on the extracellular side<sup>34,35</sup>; but phlorizin is the only one that has

259 been reported to act weakly from the intracellular side at high concentrations<sup>34</sup>.  
260 Inhibition from the inside is more potent when there is no intracellular or extracellular  
261 Na<sup>+</sup> concentration gradient<sup>34</sup>. Here, we added high concentration (500 μM) of phlorizin  
262 to the hSGLT2–MAP17 solution during the purification process, with no Na<sup>+</sup> gradient;  
263 cryo-EM captured the binding state of phlorizin accessing from the intracellular side.  
264 We examined the binding activity and transport function of hSGLT2 alanine mutants of  
265 residues S74 or D201 involved in phlorizin binding in the inward-open structure, and of  
266 F98 or F453 involved in the inhibitor interactions in the outward-facing structure of  
267 hSGLT2. Based on FSEC, all mutants (including the WT) preserved their conformation  
268 (Supplementary Fig. 1d).

269           Unexpectedly, the F98A and F453A single mutants did not bind to phlorizin  
270 (Fig. 3e); F98 and F453 not only participate in the inhibitor binding in the  
271 outward-facing conformation, but also form  $\pi$ - $\pi$  stacking interactions with each other in  
272 the inward-open conformation, which is probably important for maintaining the  
273 inward-open state (Fig. 3c). The low-affinity binding phase of phlorizin was lost in both  
274 the S74A and D201A mutants, with phlorizin binding only to the high-affinity site of the  
275 WT (Fig. 3e, f, Supplementary Data Table 3). Phloretin, the aglycon tail of phlorizin,  
276 binds to the WT as well as phlorizin but not to the S74A and D201A mutants (Fig. 3g).  
277 Therefore, S74A and D201A have lost the ability to bind phlorizin on the cytoplasmic  
278 side but can still bind it on the extracellular site. Since the S74A, F98A, and F453A  
279 mutants maintained  $\alpha$ -MG uptake (Fig. 3h), we performed experiments to inhibit sugar  
280 uptake using phlorizin. Inhibition of  $\alpha$ -MG uptake by phlorizin was greatly impaired in  
281 the F98A and F453A mutants, which lacked phlorizin-binding ability, but was  
282 maintained in the S74A mutant, in which the outer binding site was functional (Fig. 3i,



283 Supplementary Data Table 4). No clear uptake of  $\alpha$ -MG was observed in the D201A  
284 mutant (Fig. 3h). D201 corresponds to D204 in hSGLT1, which is involved in the Na<sup>3</sup>  
285 site formation and is important for sugar uptake activity and cell trafficking; it is  
286 expected to play a similar role in hSGLT2<sup>36</sup>. These results support the previous  
287 suggestions that phlorizin strongly and weakly inhibits hSGLT2 from the extracellular  
288 and intracellular sides, respectively.

289

### 290 ***Structural rearrangement from the outward to inward conformations***

291 Given that hSGLT2 exhibits outward and inward conformations, we will consider its  
292 structural changes during sugar transport. TM1-10 is conserved in the LeuT family.  
293 hSGLT2 contains a bundle domain comprising TM1, -2, -6, and -7, a hash domain  
294 comprising TM3, -4, -8, and -9, and two gating helices, TM5 and -10. In addition, the  
295 core of hSGLT2 was surrounded by TM0, TM11–13, and MAP17 (Fig. 4).

296           The bundle domain of LeuT-fold transporters such as Mhp1 and vSGLT1 is  
297 reportedly fixed, while the hash domain and gating helices rotate to transport substrates  
298 via an alternating-access mechanism<sup>12</sup>. When the bundle domains are superimposed  
299 between the inward and outward structures, TM13 and MAP17 are also well  
300 superimposed, while the other parts of the transporter change their location and  
301 conformation (Fig. 4a, Supplementary Movie 1). MAP17 is expected to affect the active  
302 conformation of hSGLT2, because its co-expression enhances hSGLT2 activity, without  
303 altering hSGLT2 expression on the plasma membrane<sup>18</sup>. However, the present structure  
304 suggests that MAP17 stabilizes the bundle domain together with TM13, as a scaffolding  
305 protein in the plasma membrane (Fig. 4a).

306           The substrate-binding site and external vestibule are formed by TM1, -2, -6,  
307 and -10 in the outward-facing conformation (Fig. 4b, c). Y290 in TM6, N75 in TM1,  
308 and K154 in TM3 form  $\pi$ -cation interactions, where the corresponding interaction of  
309 vSGLT1 is thought to act as an inner gate for substrates. SGLT1/2 has a characteristic  
310 Pro-Pro motif (465, 466) in the middle of TM10, causing a bend in the  $\alpha$ -helix (Fig. 4c,  
311 e). This causes F453 of TM10 to form a T-shaped  $\pi$ - $\pi$  interaction with F98 of TM2 in  
312 the inward-open conformation; the external vestibule is covered by this interaction, and  
313 by L84 of TM1 (Fig. 4e). These residues are thought to act as external gates for  
314 transporters. The binding of the distal aromatic ring to the outward-facing conformation  
315 moves the F453 side chain of TM10 to the opposite side, and instead the distal aromatic  
316 ring forms a tight interaction with F98 of TM2, thus inhibiting the inward transition  
317 (Supplementary Movie 1). This is consistent with the reduced binding activity of  
318 SGLT2 inhibitors in the F98A and F453A mutants (Supplementary Fig. 1e).  
319 The inward-open structure, which has no Na<sup>+</sup> bound, is thought to mimic the structure  
320 once Na<sup>+</sup> and the substrate are transported into the cytoplasmic side<sup>14</sup>. With the  
321 movement of the hash domain and gating helices, the interaction between K154 of TM3  
322 and Y290 of TM6 is broken (Fig. 4c, e), and TM8 moves so that it fills the space  
323 partially occupied by TM3. Furthermore, TM8 and the intracellular part of its  
324 connecting TM9 outwardly shift significantly. The small-loop structure of ILO stabilizes  
325 the outward-facing structure from the intracellular side, together with a cation- $\pi$   
326 interaction between R427 and Y55, which becomes lost and disordered in the  
327 inward-open conformation. In SGLT1 and vSGLT, the small helical structure ILO in the  
328 inward-open conformation is also disordered<sup>14,17</sup>, and is therefore thought to be  
329 conserved among these proteins.

330                   Because phlorizin was bound to the low-affinity binding site in the  
331 inward-open conformation under these experimental conditions, we suggest that, in the  
332 absence of an Na<sup>+</sup> concentration gradient, hSGLT2 is stabilized in the inward-open  
333 conformation, and that the Na<sup>+</sup> concentration gradient may promote sodium binding to  
334 the Na<sub>2</sub> site. Although this study does not fully elucidate the dynamics of Na<sup>+</sup>  
335 binding/release and sugar uptake, it reveals that sugar uptake depends on the change  
336 from the outward-facing to the inward-open conformation, and that groove formation by  
337 the inward-open structure without Na<sup>+</sup> binding is the driving force of sugar uptake.  
338 Based on molecular dynamics studies of vSGLT, sugar uptake occurs after Na<sup>+</sup> is  
339 released<sup>14</sup>, which is consistent with our findings. After the uptake of sugar and sodium  
340 is completed in the inward-open state of the protein, the sodium concentration gradient  
341 drives the change toward the outward-open conformation, allowing the next sodium ion  
342 to be accepted, thus rotating the glucose transport cycle. Our structural findings  
343 therefore provide support for the proposed Na<sup>+</sup>-glucose co-transport mechanism.

344                   In summary, we have elucidated the structures of five  
345 hSGLT2–MAP17-inhibitor complexes using cryo-EM, in addition to the  
346 sodium-binding outward-facing and inward-open structures of hSGLT2 and a two-phase  
347 mode of inhibition. This allowed us to identify the unprecedented role of Na<sup>+</sup> ions in  
348 regulating transport state dynamics (Fig. 5). Most sodium-bound symporters of the  
349 LeuT family share their Na<sub>2</sub> site and domain structures and may employ a common  
350 transport mechanism. We believe that our findings will help us to better understand the  
351 molecular mechanism of action of this transporter family and to develop new drugs that  
352 target disease-related transporters.

353

## 354 **Methods**

### 355 *Reagent and Chemicals*

356 Canagliflozin and TA-1887 were synthesized by Mitsubishi Tanabe Pharma Corporation  
357 (Yokohama, Japan)<sup>32,37</sup>. Dapagliflozin and sotagliflozin were purchased from Cayman  
358 Chemical Company (Ann Arbor, MI). Phlorizin, phloretin, and  $\alpha$ -MG were purchased  
359 from Sigma-Aldrich (St. Louis, MO).

360

### 361 *Expression and purification of the hSGLT2-MAP17 heterodimer*

362 hSGLT2 (UniProt: P31639-1) cDNA and human MAP17 (UniProt: Q13113-1) cDNA  
363 were synthesized and codon-optimized for expression in human cell lines. Both cDNAs  
364 were cloned into pcDNA3.4 vector. The hSGLT2 sequence was fused with an  
365 N-terminal signal sequence from human trypsinogen 1, a His10 tag, and super-folder  
366 green fluorescent protein (sfGFP), followed by a human rhinovirus 3C protease  
367 (HRV3C protease) recognition site. Point mutations were introduced into this construct  
368 using site-directed mutagenesis.

369 Mammalian Expi293 cells (Thermo Fisher Scientific, Waltham, MA) were grown and  
370 maintained in Expi293 Expression Medium at 37 °C and 8% CO<sub>2</sub> under humidified  
371 conditions. Cells were transiently transfected at a density of  $2.0 \times 10^6$  cells mL<sup>-1</sup> with  
372 the plasmids and FectoPRO (Polyplus, Illkirch-Graffenstaden, France). Approximately  
373 320  $\mu$ g of the hSGLT2 plasmid and 160  $\mu$ g of the MAP17 plasmid were premixed with  
374 720  $\mu$ L of FectoPRO reagent in 60 mL of Opti-MEM (Gibco) for 10–20 min before  
375 transfection. For transfection, 60 ml of the mixture was added to 0.6 L the cell culture  
376 and incubated at 37 °C in the presence of 8% CO<sub>2</sub> for 72 h before collection. The cells

377 were collected by centrifugation (800 ×g, 10 min, 4 °C) and stored at –80 °C before  
378 use. The detergent-solubilized proteins were analyzed by fluorescence-detection  
379 size-exclusion chromatography (FSEC) using an ACQUITY UPLC BEH450 SEC 2.5  
380 μm column (Waters, Milford, MA).

381 To prepare the complex sample with phlorizin, the cells were solubilized for 1 h at  
382 4 °C in buffer (50 mM HEPES-NaOH [pH 7.5], 300 mM NaCl, 2% (w/v)  
383 N-dodecyl β-d-maltoside (DDM, Calbiochem, San Diego, CA), protease inhibitor  
384 cocktail, and 1 mM phlorizin). After ultracentrifugation (138,000 ×g, 60 min, 4 °C),  
385 the supernatant was incubated with Affi-Gel 10 (Bio-Rad, Hercules, CA) coupled with a  
386 GFP-binding nanobody<sup>38</sup> and incubated for 2 h at 4 °C. The resin was washed five  
387 times with three column volumes of wash buffer (50 mM HEPES-NaOH (pH 7.5),  
388 300 mM NaCl, 0.05% DDM (GLYCON Biochemicals, Luckenwalde, Germany), and  
389 1 mM phlorizin), and gently suspended overnight with HRV3C protease to cleave the  
390 His10-sfGFP tag. After HRV3C protease digestion, the flow-through was pooled,  
391 concentrated, and purified by size-exclusion chromatography on a Superose 6 Increase  
392 10/300 GL column (GE Healthcare, Chicago, IL), and equilibrated with SEC buffer  
393 (20 mM HEPES-NaOH [pH 7.5], 150 mM NaCl, 0.03% DDM [GLYCON], and 0.5  
394 mM phlorizin). For the complex samples with canagliflozin, TA-1887, dapagliflozin,  
395 and sotagliflozin, the same procedure was performed, but at inhibitor concentrations of  
396 30 μM each. The peak fractions were pooled and concentrated to 6–10 mg ml<sup>-1</sup>.

397

### 398 ***Methyl α-D-glucopyranoside (α-MG) uptake in hSGLT2-transfected HEK293 cells***

399 HEK293 cells (ECACC 85120602) were maintained in Dulbecco's modified Eagle's  
400 medium (Gibco) supplemented with 10% fetal bovine serum (FBS; Thermo Scientific),

401 2 mM l-glutamate, 100 U/mL benzylpenicillin, and 100 µg/mL streptomycin, at 37 °C  
402 in a humidified atmosphere of 5% CO<sub>2</sub> in air. HEK293 cells were transiently transfected  
403 with 0.25 µg pcDNA3.4 vector containing a MAP17-coding region and 0.50 µg  
404 pcDNA3.4 vector containing an hSGLT2-coding region, using Lipofectamine 2000  
405 (Life Technologies, Carlsbad, CA), and cultured for 48 h. The medium was removed,  
406 and the cells were washed twice, then preincubated with extracellular fluid buffer  
407 without glucose (122 mM NaCl, 25 mM NaHCO<sub>3</sub>, 3 mM KCl, 1.4 mM CaCl<sub>2</sub>, 2 mM  
408 MgSO<sub>4</sub>, 0.4 mM K<sub>2</sub>HPO<sub>4</sub>, 10 mM HEPES; pH 7.4) at 37 °C for 20 min. After  
409 preincubation, uptake was initiated by replacing the preincubation buffer with  
410 extracellular fluid buffer containing 500 µM α-MG in the absence or presence of  
411 inhibitors. Uptake was completed by removing the uptake buffer and washing with  
412 ice-cold buffer three times, followed by solubilization in 1 N NaOH at room  
413 temperature. The uptake of α-MG gradually increased over 60 min (Supplementary Fig.  
414 1E) and the incubation time in the inhibition assay was 30 min.  
415 Cell lysates were deproteinized by adding acetonitrile containing candesartan as the  
416 internal standard. The concentration of α-MG was quantified via LC-MS/MS, using the  
417 internal standard method.  
418 Specific peaks of α-MG were observed in the lysates of mock cells and  
419 hSGLT2-expressing cells incubated with α-MG, but no specific peaks were observed in  
420 the lysates of mock cells without the addition of α-MG (Supplementary Fig. 1F).  
421 Cellular protein content was determined using a bicinchoninic acid (BCA) protein assay  
422 kit (Thermo Fisher Scientific). The uptake of α-MG was expressed as the ratio of  
423 pmol/mg protein in the cells to pmol/µL in the medium (cell-to-medium ratio; µL/mg  
424 protein).

425 In the inhibition study, the cell-to-medium ratio of cells transfected with the empty  
426 vector was used as the background. The specific  $\alpha$ -MG uptake was calculated by  
427 subtracting the background from the total cell-to-medium ratio and normalized to the  
428 uptake achieved without the inhibitor. The three replicates were obtained from the same  
429 samples. IC<sub>50</sub> was calculated via nonlinear regression using GraphPad Prism 8.4.3.

430

#### 431 *SGLT2 inhibitor-binding assay by affinity selection-mass spectrometry*

432 To examine the inhibition of binding to the crude membrane, mammalian Expi293 cells  
433 were co-transfected with hMAP17 and wild-type hSGLT2 or its mutants, as described  
434 above. The cells were collected and disrupted by sonication in a hypotonic buffer  
435 (50  $\mu$ M HEPES-NaOH [pH 7.5], 10  $\mu$ M KCl, and protease inhibitor cocktail) or  
436 Na<sup>+</sup>-free hypotonic buffer (50  $\mu$ M Tris-HCl [pH 7.5], 10  $\mu$ M KCl, and protease  
437 inhibitor cocktail). Cell debris were removed by centrifugation (2,000  $\times$ g, 5 min,  
438 4  $^{\circ}$ C). The membrane fraction was collected by ultracentrifugation (112,000  $\times$ g, 30  
439 min, 4  $^{\circ}$ C) and stored at  $-80^{\circ}$ C before use. The crude membrane (250  $\mu$ g per sample)  
440 was incubated with SGLT2 inhibitor in an assay buffer (100 mM NaCl, 10 mM  
441 HEPES/Tris, pH 7.4) or Na<sup>+</sup>-free assay buffer (100 mM choline chloride, 10 mM  
442 HEPES/Tris, pH 7.4) at room temperature for 2 h. Reactions were terminated by  
443 filtration through a GF/C filter plate (Corning Inc., Corning, NY) presoaked in assay  
444 buffer containing 0.1% BSA. The sample in the filter plate was washed three times with  
445 the assay buffer and eluted with acetonitrile : water (80:20, v/v). The extract solution  
446 from the filter plate was diluted with water containing candesartan as an internal  
447 standard, and the concentration of SGLT2 inhibitors was quantified using LC-MS/MS.

448 Non-specific binding was determined by the membrane fraction of the  
449 non-transfected-Expi293 cells, and specific binding was calculated by subtracting the  
450 non-specific binding from the binding of hSGLT2-expressing cells. Specific binding  
451 was normalized to hSGLT2 protein expression levels, measured by FSEC. The  
452 equilibrium dissociation constant ( $K_d$ ) and maximum number of binding sites ( $B_{max}$ )  
453 were calculated via nonlinear regression in GraphPad Prism 8.4.3. The specific binding  
454 of the hSGLT2 mutants was normalized to that of wild-type hSGLT2.

455

#### 456 ***Quantification of SGLT2 substrate and inhibitors via LC-MS/MS***

457 The concentration of the extract solution from the filter plate and cell lysate was  
458 quantified using tandem mass spectrometry (QTRAP6500 System (SCIEX,  
459 Framingham, MA) coupled with an ACQUITY UPLC system (Waters) using the  
460 internal standard method. Mobile phases A and B used 10 mM of ammonium  
461 bicarbonate and acetonitrile, respectively. Chromatographic separation was performed  
462 on an ACQUITY UPLC BEH C18 column (2.1 mm  $\times$  100 mm, 1.7  $\mu$ m; Waters) at  
463 50 °C, with the following gradient of mobile phase B: 1% (at 0.00 to 0.50 min), 1% to  
464 95% (0.50 to 2.00 min), 95% (2.00 to 2.50 min), and 1% (2.51 to 3.0 min); the flow rate  
465 was 0.4 mL/min. Mass spectrometric detection was performed by multiple reaction  
466 monitoring in the electrospray-ionization negative-ion mode, using m/z 443.1 / 364.9  
467 for canagliflozin; 425.9 / 264.1 for TA-1887; 407.0 / 328.8 for dapagliflozin; 423.0 /  
468 387.0 for sotagliflozin; 435.0 / 273.0 for phlorizin; 273.0 / 148.9 for phloretin; and  
469 192.9 / 100.9 for  $\alpha$ -MG.

470



471 ***Electron microscopy sample preparation***

472 The purified protein solution of hSGLT2–MAP17 was mixed with the inhibitor  
473 solutions except for phlorizin, with final concentrations of 0.5 mM dapagliflozin,  
474 TA-1887, sotagliflozin, or canagliflozin. After incubation for 1 h on ice, the grids were  
475 glow-discharged in low-pressure air with a 10 mA current in a PIB-10 (Vacuum  
476 Device, Mito, Japan). The protein solutions containing 0.5 mM of the inhibitors were  
477 applied to a freshly glow-discharged Quantifoil Holey Carbon Grid (R1.2/1.3, Cu/Rh,  
478 300 mesh)(SPT Labtech, Melbourne Hertfordshire, UK) using a Vitrobot Mark IV  
479 (Thermo Fisher Scientific) at 4 °C, with a blotting time of 4–6 s under 99% humidity  
480 conditions; the grids were then plunge-frozen in liquid ethane.

481

482 ***Electron microscopy data collection and processing***

483 The grids containing phlorizin, TA-1887, dapagliflozin, and sotagliflozin were  
484 transferred to a Titan Krios G3i (Thermo Fisher Scientific) running at 300 kV and  
485 equipped with a Gatan Quantum-LS Energy Filter (GIF) and a Gatan K3 Summit direct  
486 electron detector in the correlated double sampling mode. Imaging was performed at a  
487 nominal magnification of 105,000 $\times$ , corresponding to a calibrated pixel size of 0.83  
488 Å/px (The University of Tokyo, Japan). Each movie was dose fractionated to 64 frames  
489 at a dose rate of 6.2–9.0 e<sup>-</sup>/px/s at the detector, resulting in a total accumulated exposure  
490 of 64 e<sup>-</sup>/Å<sup>2</sup> of the specimen. The data were automatically acquired using the image-shift  
491 method in SerialEM software<sup>39</sup>, with a defocus range of –0.8 to –1.6 μm.

492 The grid with canagliflozin was transferred to a Titan Krios G4 device (Thermo Fisher  
493 Scientific) running at 300 kV and equipped with a Gatan Quantum-LS Energy Filter  
494 (GIF) and a Gatan K3 Summit direct electron detector in correlated double sampling

495 mode. Imaging was performed at a nominal magnification of 215,000 $\times$ , corresponding  
496 to a calibrated pixel size of 0.4  $\text{\AA}/\text{px}$  (The University of Tokyo, Japan). Each movie was  
497 recorded for 1.4 seconds and subdivided into 64 frames. Electron flux was set to 7.5  
498  $e^-/\text{px}/\text{s}$  at the detector, resulting in an accumulated exposure of 64  $e^-/\text{\AA}^2$  of the specimen.  
499 The data were automatically acquired via the image-shift method using EPU software  
500 (Thermo Fisher Scientific), with a defocus range of  $-0.6$  to  $-1.6$   $\mu\text{m}$ . The total number  
501 of images is described in Supplementary Data Table 1.  
502 For all datasets, the dose-fractionated movies were subjected to beam-induced motion  
503 correction using RELION<sup>23</sup>, and the contrast transfer function (CTF) parameters were  
504 estimated using CTFFIND4<sup>40</sup>.  
505 For the canagliflozin-bound state dataset, 2,364,108 particles were initially selected  
506 from 19,943 micrographs, using the topaz-picking function in RELION-4.0<sup>24</sup>. Particles  
507 were extracted by downsampling to a pixel size of 3.2  $\text{\AA}/\text{px}$ . These particles were  
508 subjected to several rounds of 2D and 3D classification. The best class contained  
509 221,701 particles, which were then re-extracted with a pixel size of 1.60  $\text{\AA}/\text{px}$  and  
510 subjected to 3D refinement. The second 3D classification resulted in three map classes.  
511 The best class from the 3D classification contained 179,761 particles, which were  
512 subjected to 3D refinement. The particles were subsequently subjected to micelle  
513 subtraction and non-aligned 3D classification using a mask (without micelles), resulting  
514 in three map classes. The best class, containing 65,919 particles, was subjected to 3D  
515 refinement, reversion to the original particles, and 3D refinement. The particle set was  
516 resized to 1.00  $\text{\AA}/\text{px}$ , and subjected to Bayesian polishing, 3D refinement, and  
517 per-particle CTF refinement before the final 3D refinement and post-processing,  
518 yielding a map with a global resolution of 3.1  $\text{\AA}$ , according to the FSC = 0.143 criterion.

519 Finally, local resolution was estimated using RELION-4. The processing strategy is  
520 illustrated in Supplementary Fig. 3.

521

522 For the dapagliflozin-bound-state dataset, 3,692,950 particles were initially selected  
523 from 4,841 micrographs, using the topaz-picking function in RELION-4.0. Particles  
524 were extracted by downsampling to a pixel size of 3.32 Å/px. These particles were  
525 subjected to several rounds of 2D and 3D classification. The best class contained  
526 569,516 particles, which were then re-extracted at a pixel size of 1.30 Å/px and  
527 subjected to 3D refinement. Non-aligned 3D classification using a soft mask covering  
528 the proteins and micelles resulted in four map classes. The best class from the 3D  
529 classification contained 197,695 particles, which were subjected to 3D refinement,  
530 per-particle CTF refinement, and 3D refinement. The resulting 3D model and particle  
531 set were resized to 1.11 Å/px and subjected to Bayesian polishing, 3D refinement, and  
532 per-particle CTF refinement. Final 3D refinement and post-processing yielded maps  
533 with global resolutions of 2.8 Å, according to the FSC = 0.143 criterion. Finally, the  
534 local resolution was estimated using RELION-3. The processing strategy is illustrated in  
535 Supplementary Fig. 4.

536 For the TA-1887-bound state dataset, 3,395,470 particles were initially selected from  
537 4,383 micrographs, using the topaz-picking function in RELION-4. Particles were  
538 extracted by downsampling to a pixel size of 3.32 Å/px. These particles were subjected  
539 to several rounds of 2D and 3D classification. The best class contained 274,477  
540 particles, which were then re-extracted with a pixel size of 1.30 Å/px and subjected to  
541 3D refinement. Non-aligned 3D classification using a soft mask covering the proteins  
542 and micelles resulted in three map classes. The best class from the 3D classification

543 contained 103,853 particles, which were subjected to 3D refinement, per-particle CTF  
544 refinement, and 3D refinement. The resulting 3D model and particle set were resized to  
545 1.11 Å/px and subjected to Bayesian polishing, 3D refinement, and per-particle CTF  
546 refinement. Final 3D refinement and post-processing yielded maps with global  
547 resolutions of 2.9 Å, according to the FSC = 0.143 criterion. Local resolution was  
548 estimated using RELION-4. The processing strategy is illustrated in Supplementary Fig.  
549 5.

550 For the sotagliflozin-bound state dataset, 5,242,427 particles were initially selected from  
551 5,499 micrographs using the topaz-picking function in RELION-4. Particles were  
552 extracted by downsampling to a pixel size of 3.32 Å/px. These particles were subjected  
553 to several rounds of 2D and 3D classifications. The best class contained 823,369  
554 particles, which were then re-extracted with a pixel size of 1.30 Å/px and subjected to  
555 3D refinement. Non-aligned 3D classification using a soft mask covering the proteins  
556 and micelles resulted in four classes of maps. The two good classes from the 3D  
557 classification contained 227,811 particles, which were subjected to 3D refinement. The  
558 resulting 3D model and particle set were resized to 1.11 Å/px and subjected to Bayesian  
559 polishing, 3D refinement, and further non-aligned 3D classification using a soft mask  
560 covering the proteins and micelles. The best class from the 3D classification contained  
561 72,773 particles, which were subjected to 3D refinement, per-particle CTF refinement,  
562 3D refinement, Bayesian polishing, 3D refinement, and per-particle CTF refinement.  
563 The final 3D refinement and post-processing yielded maps with global resolutions of  
564 3.1 Å, according to the FSC = 0.143 criterion. Finally, the local resolution was  
565 estimated using RELION. The processing strategy is illustrated in Supplementary Fig.  
566 6.

567 For the phlorizin-bound state dataset, 3,013,029 particles were initially selected from  
568 3,159 micrographs using the Laplacian-of-Gaussian picking function in RELION-3.1<sup>23</sup>  
569 and were used to generate two-dimensional (2D) models for reference-based particle  
570 picking. Particles were extracted by downsampling to a pixel size of 3.32 Å/px. These  
571 particles were subjected to several rounds of 2D and 3D classification. The best class  
572 contained 324,355 particles, which were then re-extracted with a pixel size of 1.66 Å/px  
573 and subjected to 3D refinement. The particles were subsequently subjected to micelle  
574 subtraction and non-aligned 3D classification using a mask (excluding the micelles),  
575 resulting in three map classes. The best class contained 76,485 particles, which were  
576 then subjected to 3D refinement and reversion to the original particles. The particle set  
577 was resized to 1.30 Å/px, and subjected to Bayesian polishing, 3D refinement, and  
578 per-particle CTF refinement before the final 3D refinement and post-processing,  
579 yielding a map with a global resolution of 3.3 Å according to the FSC = 0.143 criterion.  
580 Finally, the local resolution was estimated using RELION-3. The processing strategy is  
581 illustrated in Supplementary Fig. 8.

582

### 583 ***Model building and validation***

584 The models of the phlorizin-bound inward state of hSGLT2–MAP17 were manually  
585 built, de novo, using the cryo-EM density map tool in COOT, facilitated by an  
586 hSGLT2-homology model generated using Alphafold2<sup>41</sup>. After manual adjustment, the  
587 models were subjected to structural refinement via the Servalcat pipeline in  
588 REFMAC5<sup>42</sup> and manual real-space refinement in COOT. The models of the  
589 dapagliflozin-, TA-1887-, sotagliflozin-, and canagliflozin-bound outward states were  
590 built using the Alphafold2-derived hSGLT2-homology model as the starting model. The

591 3D reconstruction and model refinement statistics are summarized in Supplementary

592 Data Table 1. All molecular graphics figures were prepared using CueMol

593 (<http://www.cuemol.org>) and UCSF Chimera<sup>43</sup>.

594

595

## 596 **Acknowledgements**

597 We thank Y. Lee and T. Nishizawa for technical advice on sample preparation; K.

598 Yamashita for technical advice on refinement using Servalcat; T. Saijo, T. Takahashi and

599 Y. Kamikozawa for technical advice on functional analyses; and M. Shiotani, C.

600 Kuriyama, and Y. Yamamoto for fruitful discussions about the inhibitory mechanism.

601 We thank the scientific staff of the cryo-EM facility of the University of Tokyo, and

602 especially Y. Kise, Y. Sakamaki, T. Kusakizako, H. Yanagisawa, A. Tsutsumi, M.

603 Kikkawa, and R. Danev.

604 This work was not supported by external funding.

605

## 606 **Author contributions**

607 M.H. designed the entire study. M.H. performed the cryo-EM analyses, with sample

608 preparation assistance from T.K.; M.H. and T.A. designed and performed the functional

609 analyses, with sample preparation assistance from M.H. and T.K. M.H. performed

610 model building and model refinement, with assistance from H.K. and K.M. M.H., T.A.,

611 N.T., I.M., and O.N. wrote and edited the manuscript, with help from all other authors.

612 M.H., T.A., I.M., and O.N. supervised the study.

613

614 **Materials and correspondence**

615 Masahiro Hiraizumi, Ikuko Miyaguchi, and Osamu Nureki

616

617 **Competing interests:**

618 Masahiro Hiraizumi, Tomoya Akashi, Kouta Murasaki, Hiroyuki Kishida, Taichi

619 Kumanomidou, Nao Torimoto, and Ikuko Miyaguchi are employees of Mitsubishi

620 Tanabe Pharma Corporation. Osamu Nureki is a co-founder of, and scientific advisor to,

621 Curreio.

622

623 **Data and materials availability**

624 Cryo-EM density maps were deposited in the Electron Microscopy Data Bank under

625 accession codes EMD-34673 (canagliflozin-bound state), EMD-34705

626 (dapagliflozin-bound state), EMD-34610 (TA-1887-bound state), EMD-34737

627 (sotagliflozin-bound state), and EMD-34823 (phlorizin-bound state). Atomic

628 coordinates have been deposited in the Protein Data Bank under IDs 8HDH

629 (canagliflozin-bound state), 8HEZ (dapagliflozin-bound state), 8HB0 (TA-1887-bound

630 state), 8HG7 (sotagliflozin-bound state), and 8HIN (phlorizin-bound state).

631 The datasets generated during and/or analysed during the current study are available

632 from the corresponding author on reasonable request.

633

634 **References**

635 1. Maccari, R. & Ottanà, R. Sodium-Glucose Cotransporter Inhibitors as  
636 Antidiabetic Drugs: Current Development and Future Perspectives. *J. Med. Chem.* **65**,  
637 10848–10881 (2022).

638 2. Wright, E. M., Loo, D. D. F. & Hirayama, B. A. Biology of Human Sodium

- 639 Glucose Transporters. *Physiol. Rev.* **91**, 733–794 (2011).
- 640 3. Kanai, Y., Lee, W. S., Brown, D. & Hediger, M. A. The human kidney low  
641 affinity Na<sup>+</sup>/glucose cotransporter SGLT2. Delineation of the major renal reabsorptive  
642 mechanism for D-glucose. *J. Clin. Invest.* **93**, 397–404 (1994).
- 643 4. Isaji, M. SGLT2 inhibitors: molecular design and potential differences in effect.  
644 *Kidney Int.* **79**, S14–S19 (2011).
- 645 5. Faillie, J.-L. Pharmacological aspects of the safety of gliflozins. *Pharmacol.*  
646 *Res.* **118**, 71–81 (2017).
- 647 6. Wright, E. M. SGLT2 Inhibitors: Physiology and Pharmacology. *Kidney360* **2**,  
648 2027–2037 (2021).
- 649 7. Lim, V. G. *et al.* SGLT2 Inhibitor, Canagliflozin, Attenuates Myocardial  
650 Infarction in the Diabetic and Nondiabetic Heart. *JACC Basic Transl. Sci.* **4**, 15–26  
651 (2019).
- 652 8. Bhattacharya, S. *et al.* An exhaustive perspective on structural insights of  
653 SGLT2 inhibitors: A novel class of antidiabetic agent. *Eur. J. Med. Chem.* **204**, 112523  
654 (2020).
- 655 9. Powell, D. R. *et al.* LX2761, a Sodium/Glucose Cotransporter 1 Inhibitor  
656 Restricted to the Intestine, Improves Glycemic Control in Mice. *J. Pharmacol. Exp.*  
657 *Ther.* **362**, 85–97 (2017).
- 658 10. Powell, D. R. *et al.* LX4211 Increases Serum Glucagon-Like Peptide 1 and  
659 Peptide YY Levels by Reducing Sodium/Glucose Cotransporter 1 (SGLT1)–Mediated  
660 Absorption of Intestinal Glucose. *J. Pharmacol. Exp. Ther.* **345**, 250–259 (2013).
- 661 11. Sands, A. T. *et al.* Sotagliflozin, a Dual SGLT1 and SGLT2 Inhibitor, as  
662 Adjunct Therapy to Insulin in Type 1 Diabetes. *Diabetes Care* **38**, 1181–1188 (2015).
- 663 12. del Alamo, D., Meiler, J. & Mchaourab, H. S. Principles of Alternating Access  
664 in LeuT-fold Transporters: Commonalities and Divergences. *J. Mol. Biol.* **434**, 167746  
665 (2022).
- 666 13. Gyimesi, G., Pujol-Giménez, J., Kanai, Y. & Hediger, M. A. Sodium-coupled  
667 glucose transport, the SLC5 family, and therapeutically relevant inhibitors: from  
668 molecular discovery to clinical application. *Pflüg. Arch. - Eur. J. Physiol.* **472**,  
669 1177–1206 (2020).
- 670 14. Watanabe, A. *et al.* The mechanism of sodium and substrate release from the  
671 binding pocket of vSGLT. *Nature* **468**, 988–991 (2010).
- 672 15. Faham, S. *et al.* The Crystal Structure of a Sodium Galactose Transporter  
673 Reveals Mechanistic Insights into Na<sup>+</sup>/Sugar Symport. *Science* **321**, 810–814 (2008).
- 674 16. Bisignano, P. *et al.* Inhibitor binding mode and allosteric regulation of



- 675 Na<sup>+</sup>-glucose symporters. *Nat. Commun.* **9**, 5245 (2018).
- 676 17. Han, L. *et al.* Structure and mechanism of the SGLT family of glucose  
677 transporters. *Nature* **601**, 274–279 (2022).
- 678 18. Coady, M. J. *et al.* MAP17 Is a Necessary Activator of Renal Na<sup>+</sup>/Glucose  
679 Cotransporter SGLT2. *J. Am. Soc. Nephrol.* **28**, 85–93 (2017).
- 680 19. Niu, Y. *et al.* Structural basis of inhibition of the human SGLT2–MAP17  
681 glucose transporter. *Nature* **601**, 280–284 (2022).
- 682 20. Niu, Y. *et al.* Structural mechanism of SGLT1 inhibitors. *Nat. Commun.* **13**,  
683 6440 (2022).
- 684 21. Kawate, T. & Gouaux, E. Fluorescence-Detection Size-Exclusion  
685 Chromatography for Precrystallization Screening of Integral Membrane Proteins.  
686 *Structure* **14**, 673–681 (2006).
- 687 22. Pédelacq, J.-D., Cabantous, S., Tran, T., Terwilliger, T. C. & Waldo, G. S.  
688 Engineering and characterization of a superfolder green fluorescent protein. *Nat.*  
689 *Biotechnol.* **24**, 79–88 (2006).
- 690 23. Zivanov, J. *et al.* New tools for automated high-resolution cryo-EM structure  
691 determination in RELION-3. *eLife* **7**, e42166 (2018).
- 692 24. Kimanius, D., Dong, L., Sharov, G., Nakane, T. & Scheres, S. H. W. New tools  
693 for automated cryo-EM single-particle analysis in RELION-4.0. *Biochem. J.* **478**,  
694 4169–4185 (2021).
- 695 25. Wahlgren, W. Y. *et al.* Substrate-bound outward-open structure of a  
696 Na<sup>+</sup>-coupled sialic acid symporter reveals a new Na<sup>+</sup> site. *Nat. Commun.* **9**, 1753  
697 (2018).
- 698 26. Sala-Rabanal, M. *et al.* Bridging the gap between structure and kinetics of  
699 human SGLT1. *Am. J. Physiol.-Cell Physiol.* **302**, C1293–C1305 (2012).
- 700 27. Coady, M. J., Wallendorff, B. & Lapointe, J.-Y. Characterization of the  
701 transport activity of SGLT2/MAP17, the renal low-affinity Na<sup>+</sup>-glucose cotransporter.  
702 *Am. J. Physiol.-Ren. Physiol.* **313**, F467–F474 (2017).
- 703 28. Hirayama, B. A. *et al.* Sodium-Dependent Reorganization of the Sugar-Binding  
704 Site of SGLT1. *Biochemistry* **46**, 13391–13406 (2007).
- 705 29. Kakinuma, H. *et al.* (1  
706 *S*)-1,5-Anhydro-1-[5-(4-ethoxybenzyl)-2-methoxy-4-methylphenyl]-1-thio- D -glucitol  
707 (TS-071) is a Potent, Selective Sodium-Dependent Glucose Cotransporter 2 (SGLT2)  
708 Inhibitor for Type 2 Diabetes Treatment. *J. Med. Chem.* **53**, 3247–3261 (2010).
- 709 30. Ohtake, Y. *et al.* Discovery of Tofogliflozin, a Novel C-Arylglucoside with an  
710 *O*-Spiroketal Ring System, as a Highly Selective Sodium Glucose Cotransporter 2

- 711 (SGLT2) Inhibitor for the Treatment of Type 2 Diabetes. *J. Med. Chem.* **55**, 7828–7840  
712 (2012).
- 713 31. Hummel, C. S. *et al.* Structural selectivity of human SGLT inhibitors. *Am. J.*  
714 *Physiol.-Cell Physiol.* **302**, C373–C382 (2012).
- 715 32. Nomura, S. *et al.* Novel Indole- *N* -glucoside, TA-1887 As a Sodium Glucose  
716 Cotransporter 2 Inhibitor for Treatment of Type 2 Diabetes. *ACS Med. Chem. Lett.* **5**,  
717 51–55 (2014).
- 718 33. Ožegović, B., McNamara, P. D., Goldmann, D. R. & Segal, S. Binding of [<sup>3</sup>H]  
719 phlorizin to rat kidney plasma membranes. *FEBS Lett.* **43**, 6–8 (1974).
- 720 34. Ghezzi, C. *et al.* SGLT2 inhibitors act from the extracellular surface of the cell  
721 membrane. *Physiol. Rep.* **2**, e12058 (2014).
- 722 35. Hummel, C. S. *et al.* Glucose transport by human renal Na<sup>+</sup>/D-glucose  
723 cotransporters SGLT1 and SGLT2. *Am. J. Physiol.-Cell Physiol.* **300**, C14–C21 (2011).
- 724 36. Quick, M., Loo, D. D. F. & Wright, E. M. Neutralization of a Conserved Amino  
725 Acid Residue in the Human Na<sup>+</sup>/Glucose Transporter (hSGLT1) Generates a  
726 Glucose-gated H<sup>+</sup> Channel. *J. Biol. Chem.* **276**, 1728–1734 (2001).
- 727 37. Nomura, S. *et al.* Discovery of Canagliflozin, a Novel *C* -Glucoside with  
728 Thiophene Ring, as Sodium-Dependent Glucose Cotransporter 2 Inhibitor for the  
729 Treatment of Type 2 Diabetes Mellitus. *J. Med. Chem.* **53**, 6355–6360 (2010).
- 730 38. Axel Kirchhofer *et al.* Modulation of protein properties in living cells using  
731 nanobodies. *Nat Struct Mol Biol* **17**, 133–138 (2010).
- 732 39. Mastronarde, D. N. Automated electron microscope tomography using robust  
733 prediction of specimen movements. *J. Struct. Biol.* **152**, 36–51 (2005).
- 734 40. Rohou, A. & Grigorieff, N. CTFFIND4: Fast and accurate defocus estimation  
735 from electron micrographs. 18 (2019).
- 736 41. Jumper, J. *et al.* Highly accurate protein structure prediction with AlphaFold.  
737 *Nature* **596**, 583–589 (2021).
- 738 42. Yamashita, K., Palmer, C. M., Burnley, T. & Murshudov, G. N. Cryo-EM  
739 single-particle structure refinement and map calculation using *Servalcat*. *Acta*  
740 *Crystallogr. Sect. Struct. Biol.* **77**, 1282–1291 (2021).
- 741 43. Pettersen, E. F. *et al.* UCSF Chimera--A visualization system for exploratory  
742 research and analysis. *J. Comput. Chem.* **25**, 1605–1612 (2004).
- 743

744 **Figure legends**

745 Figure 1. Biochemical and cryo-EM studies of the human SGLT2–MAP17 heterodimer.  
746 **a** Topological diagram of the hSGLT2–MAP17 heterodimer. Inverted repeats (IRs) are  
747 represented as light blue and light brown. The Y-shape indicates an N-glycosylation site.  
748 Disulfide bonds are shown as orange sticks. A signal peptide (SP) and super-folder (sf)  
749 GFP were fused to the N-terminus of hSGLT2. The dotted line indicates the site of  
750 protease activity. **b** Chemical structures of the substrates and a representative gliflozin. **c**,  
751 FSEC profiles of various types of GFP-tagged hSGLT2 without MAP17. Arrows  
752 indicate elution positions of the hSGLT2–MAP17 heterodimer and free GFP (GFP). **d**  
753  $\alpha$ -MG uptake in hSGLT2 and MAP17 expressing cells in the absence (white) or  
754 presence (orange) of 500 nM canagliflozin. Each column represents mean  $\pm$  SEM (n = 4,  
755 biological replicates). **e** Canagliflozin (30 nM) binding assay for the hSGLT2- and  
756 MAP17-expressing cell membrane fraction. Each column represents mean  $\pm$  SEM (n =  
757 3, technical replicates). **f**, Overall structure of the human SGLT2-MAP17 complex.  
758 Cryo-EM maps (top) and ribbon models (bottom). The same color scheme was used  
759 throughout the manuscript, except for Fig. 4.

760

761 Figure 2. SGLT2-inhibitor-binding site of the outward-facing conformation.

762 **a**, Cross-sections of the electrostatic surface potentials at the SGLT2 inhibitor-binding  
763 site. The potentials were displayed as a color gradient from red (negative) to blue  
764 (positive). **b**, Interactions between canagliflozin and hSGLT2. Canagliflozin and its  
765 interacting residues are shown as sticks. The hydrogen bonds are indicated by the  
766 black dashed lines. **c**, Conformation change from outward-opening (color) to  
767 inward-opening (grey) around the Na<sup>2</sup> binding site. View from the lateral side of the

768 plasma membrane (left) and from the cytoplasmic side (right). **d**,

769 Concentration-dependent binding evaluation of canagliflozin in the presence and

770 absence of Na<sup>+</sup>. Each point represents the mean ± SEM (n = 3, technical replicates).

771 **e–h**, Chemical structures of inhibitors and their interactions with hSGLT2:

772 sotagliflozin (**e**), TA-1887 (**f**), and dapagliflozin (**g**) in this study, and of empagliflozin

773 (**h**) (previously reported; <sup>19</sup>).

774

775 Figure 3. Phlorizin binding site of the inward-open conformation.

776 **a**, The inward-open conformation of the hSGLT2–MAP17 complex. Cryo-EM maps

777 (left) and ribbon models (right). **b**, Chemical structures of phlorizin and phloretin. **c**,

778 Interactions between phlorizin and hSGLT2. **d**, Concentration-dependent binding of

779 phlorizin to the wild-type hSGLT2. Each point represents the mean ± SEM (n = 3,

780 technical replicates). **e**, Concentration-dependent binding of phlorizin in wild-type and

781 mutant hSGLT2. Each point represents the mean ± SEM (n = 3, technical replicates). **f**,

782 Eadie-Hofstee plot analysis of phlorizin binding in wild-type and mutant hSGLT2. Each

783 point represents the mean ± SEM (n = 3, technical replicates). **g**,

784 Concentration-dependent binding of phloretin in wild-type and mutant hSGLT2. Each

785 point represents the mean ± SEM (n = 3, technical replicates). **h**, Uptake assay of α-MG

786 in wild-type and mutant hSGLT2. Each column represents mean ± SEM (n = 4,

787 biological replicates). **i**, Inhibitory effect of phlorizin on α-MG uptake by wild-type and

788 mutant hSGLT2. Each point represents the mean ± SEM (n = 4, biological replicates).

789

790 Figure 4. Comparison of the outward-facing and inward-open conformations of  
791 hSGLT2.  
792 **a**, The outward-facing (colored) and inward-open (transparent) structures when their  
793 bundle domains (TM1, -2, -6, and -7; red) are superimposed. MAP17 (grey) and TM13  
794 (light orange) overlap well between the conformations, but the hash domain (TM3, -4,  
795 -8, -9; blue), gate helices (TM5, -10; green), TM0, -11 and -12 (light orange) are in the  
796 inward-opening conformation. **b**, The outward-facing conformation of the  
797 hSGLT2–MAP17 complex with canagliflozin viewed from the exoplasm (left), side  
798 (center), and cytoplasm (right). **c**, Substrate sugar-binding site and external vestibule of  
799 the outward-facing conformation from the exoplasm. **d**, The inward-open conformation  
800 of the hSGLT2–MAP17 complex with phlorizin viewed from the exoplasm (left), side  
801 (center), and cytoplasm (right). **e**, Substrate sugar-binding site and external vestibule of  
802 the inward-open conformation from the exoplasm.

803

804 Figure 5. Proposed SGLT2 transport and inhibition mechanism.

805 The bundle domain is anchored to the membrane with MAP17, and the rest of the  
806 transporter undergoes a conformational change according to an alternating-access  
807 mechanism. Upon sodium binding, the transporter opens outward to allow a substrate or  
808 inhibitors to bind. Upon substrate binding, the inner gate opens and sodium and glucose  
809 are released into the cell. After sodium and glucose are released, the transporter forms  
810 an inward-open structure and phlorizin and phloretin bind to this structure, inhibiting  
811 glucose transport.

812

813

814 Supplementary Figure 1. Biochemical characterization of the hSGLT2–MAP17  
815 complex.  
816 (a) Representative size-exclusion chromatography profile of hSGLT2–MAP17. (b)  
817 SDS-PAGE analysis of the hSGLT2–MAP17 peak fractions via size-exclusion  
818 chromatography (SEC) purification. (c) SGLT2 inhibitors (25 nM) binding to the crude  
819 membrane expressing hSGLT2 and MAP17. (d) FSEC profiles for various mutations of  
820 sfGFP-tagged hSGLT2 with MAP17. The arrows indicate the elution positions of the  
821 hSGLT2–MAP17 heterodimer and the free GFP (GFP). (e) Canagliflozin binding to the  
822 crude membrane expressing wild-type hSGLT2 and mutants. Crude membranes were  
823 incubated with 30 nM canagliflozin and binding was measured by LC-MS/MS. Data are  
824 shown as mean  $\pm$  SEM (n = 3). (f) Time-course of hSGLT2-mediated  $\alpha$ -MG uptake.  
825  $\alpha$ -MG uptake (500  $\mu$ M) by hSGLT2-expressing cells and mock cells was examined.  
826 Each point represents mean  $\pm$  SEM (n = 3). (g) Chromatograms of  $\alpha$ -MG in the lysates  
827 of untreated mock cells (No treatment), mock cells incubated with  $\alpha$ -MG (Mock), and  
828 hSGLT2- and MAP17-expressing cells incubated with  $\alpha$ -MG (hSGLT2).  
829  
830 Supplementary Figure 2. Sequence alignment of SGLT.  
831 Sequence alignment of hSGLT2 (UniProt: P31639), mSGLT2 (UniProt: Q92317),  
832 hSGLT1 (UniProt: P13866), *Vibrio parahaemolyticus* SGLT (UniProt: P96169), and  
833 *Proteus mirabilis* HI4320 sialic acid symporter (UniProt: B4EZY7), performed using  
834 Clustal Omega. Conserved transmembrane helices of hSGLT2 are indicated above the  
835 sequences. The similarly conserved residues are indicated by red letters. The residues at

836 the conserved Na<sup>2</sup> and Na<sup>3</sup> sites of SGLT are highlighted with pink circles above or  
837 white circles below the alignment, respectively.

838

839 Supplementary Figure 3. Data processing of the canagliflozin-bound state.

840 (a) Representative cryo-EM image of the hSGLT2–MAP17 complex in the presence of  
841 canagliflozin. (b) Data processing workflow of single-particle image-processing and  
842 local-resolution analysis. Particles were separated into three groups via non-aligned 3D  
843 classification, with the mask (without micelles) shown in yellow. (c) Cross-validation  
844 FSC curves for map-to-model fitting. (d) Angular distributions of the final  
845 reconstruction.

846

847 Supplementary Figure 4. Data processing of the dapagliflozin-bound state.

848 (a) Representative cryo-EM image of the hSGLT2–MAP17 complex in the presence of  
849 dapagliflozin. (b) Data processing workflow of single-particle image-processing and  
850 local-resolution analysis. Particles were separated into four groups by non-aligned 3D  
851 classification, with the mask (without micelles) shown in transparent white. (c)  
852 Cross-validation FSC curves for map-to-model fitting. (d) Angular distributions of the  
853 final reconstruction.

854

855 Supplementary Figure 5. Data processing of the TA-1887-bound state.

856 (a) Representative cryo-EM image of the hSGLT2–MAP17 complex in the presence of  
857 TA-1887. (b) Data processing workflow of single-particle image-processing and  
858 local-resolution analysis. Particles were separated into three groups via non-align 3D

859 classification, with the mask covering the proteins and micelle shown in transparent  
860 white. (c) Cross-validation FSC curves for map-to-model fitting. (d) Angular  
861 distributions of the final reconstruction.

862

863 Supplementary Figure 6. Data processing of the sotagliflozin-bound state.

864 (a) Representative cryo-EM image of the hSGLT2–MAP17 complex in the presence of  
865 sotagliflozin. (b) Data processing workflow of single-particle image-processing and  
866 local-resolution analysis. Particles were separated into three groups via two rounds of  
867 non-aligned 3D classification, with the mask covering the proteins and micelles shown  
868 in transparent white. (c) Cross-validation FSC curves for map-to-model fitting. (d)  
869 Angular distributions of the final reconstruction.

870

871 Supplementary Figure 7. The outward-opening model of hSGLT2–MAP17 in the  
872 density maps.

873 The cryo-EM density and atomic model of each segment of the outward-opening model  
874 hSGLT2–MAP17, inhibitors, and glycosylation sites, contoured to 3.0  $\sigma$ , 4.0  $\sigma$ , and 2.0  
875  $\sigma$ , respectively. Red spheres: water molecules around the inhibitors.

876

877 Supplementary Figure 8. Data processing of the phlorizin-bound state.

878 (a) Representative cryo-EM image of the hSGLT2–MAP17 complex in the presence of  
879 phlorizin. (b) Data processing workflow of single-particle image-processing and  
880 local-resolution analysis. Particles were separated into three groups by non-aligned 3D  
881 classification, with the mask covering the proteins (without micelles) shown in yellow.  
882 (c) Cross-validation FSC curves for map-to-model fitting. (d) Angular distributions of



883 the final reconstruction.

884

885 Supplementary Figure 9. Inward-open model of hSGLT2–MAP17 in the density maps.

886 The cryo-EM density and atomic models of each segment of the inward-open model of  
887 hSGLT2–MAP17, phlorizin, and glycosylation sites, contoured to  $2.9 \sigma$ ,  $2.7 \sigma$ , and  $2.7 \sigma$ ,  
888 respectively.

889

890 Supplementary Figure 10. MAP17 and SGLT2 interaction site.

891 The density of the lipid molecule (orange) is observed between MAP17 and SGLT2.

892

893 Supplementary Figure 11. Sodium ion-binding sites of SGLT2

894 (a) The sodium ion-binding Na2 sites of dapagliflozin, canagliflozin, TA-1887, and  
895 sotagliflozin are shown. (b) Sites in SGLT2 corresponding to Na3 sites where the other  
896 sodium ion binds in SGLT1. No electron density corresponding to a sodium ion can be  
897 observed. (c, d) The sodium ion-binding Na2 sites, and the sites corresponding to Na3  
898 sites of the phlorizin-bound inward-open conformation. The phlorizin binding site is  
899 near the Na2 and Na3 sites.

900

901 Supplementary Figure 12. Comparison of the inward conformation of other SGLT

902 structures.

903 Structural comparison of sites corresponding to the intracellular phlorizin-binding sites  
904 of SGLT2. From left to right, inward-occluded conformation of hSGLT1,  
905 inward-occluded conformation of vSGLT, and inward-open conformation of vSGLT.

906 The structures

907 are viewed from the membrane side.

908

909 Supplementary Data Table 1.

910 Data collection, processing, model refinement, and validation. Clash scores, rotamer

911 outliers, and Ramachandran plots were calculated using the Servalcat pipeline.

912

913 Supplementary Data Table 2.

914 Kinetic parameters of canagliflozin binding in the membrane fraction of

915 hSGLT2-expressing and MAP17-expressing cells, in the presence or absence of Na<sup>+</sup>.

916

917 Supplementary Data Table 3.

918 Kinetic parameters of phlorizin and phloretin binding in the membrane fraction of

919 wild-type cells or cells expressing mutated hSGLT2 and MAP17.

920

921 Supplementary Data Table 4.

922 IC<sub>50</sub> values of phlorizin in α-MG uptake by wild-type and mutant hSGLT2.

923

924 Supplementary Movie 1.

925 Movement of SGLT2 during sugar uptake, as predicted from the cryo-EM structures.

926 The bundle domain (TM1, -2, -6, -7; red) functions as the axis together with MAP17

927 (gray). TM13 (light orange), the hash domains (TM3, -4, -8, -9; blue), and the gate

928 helices TM5 and TM10 (green) and TM0, TM11, and -12 (light orange) move

929 significantly, transporting the sugar to the intracellular side.

930



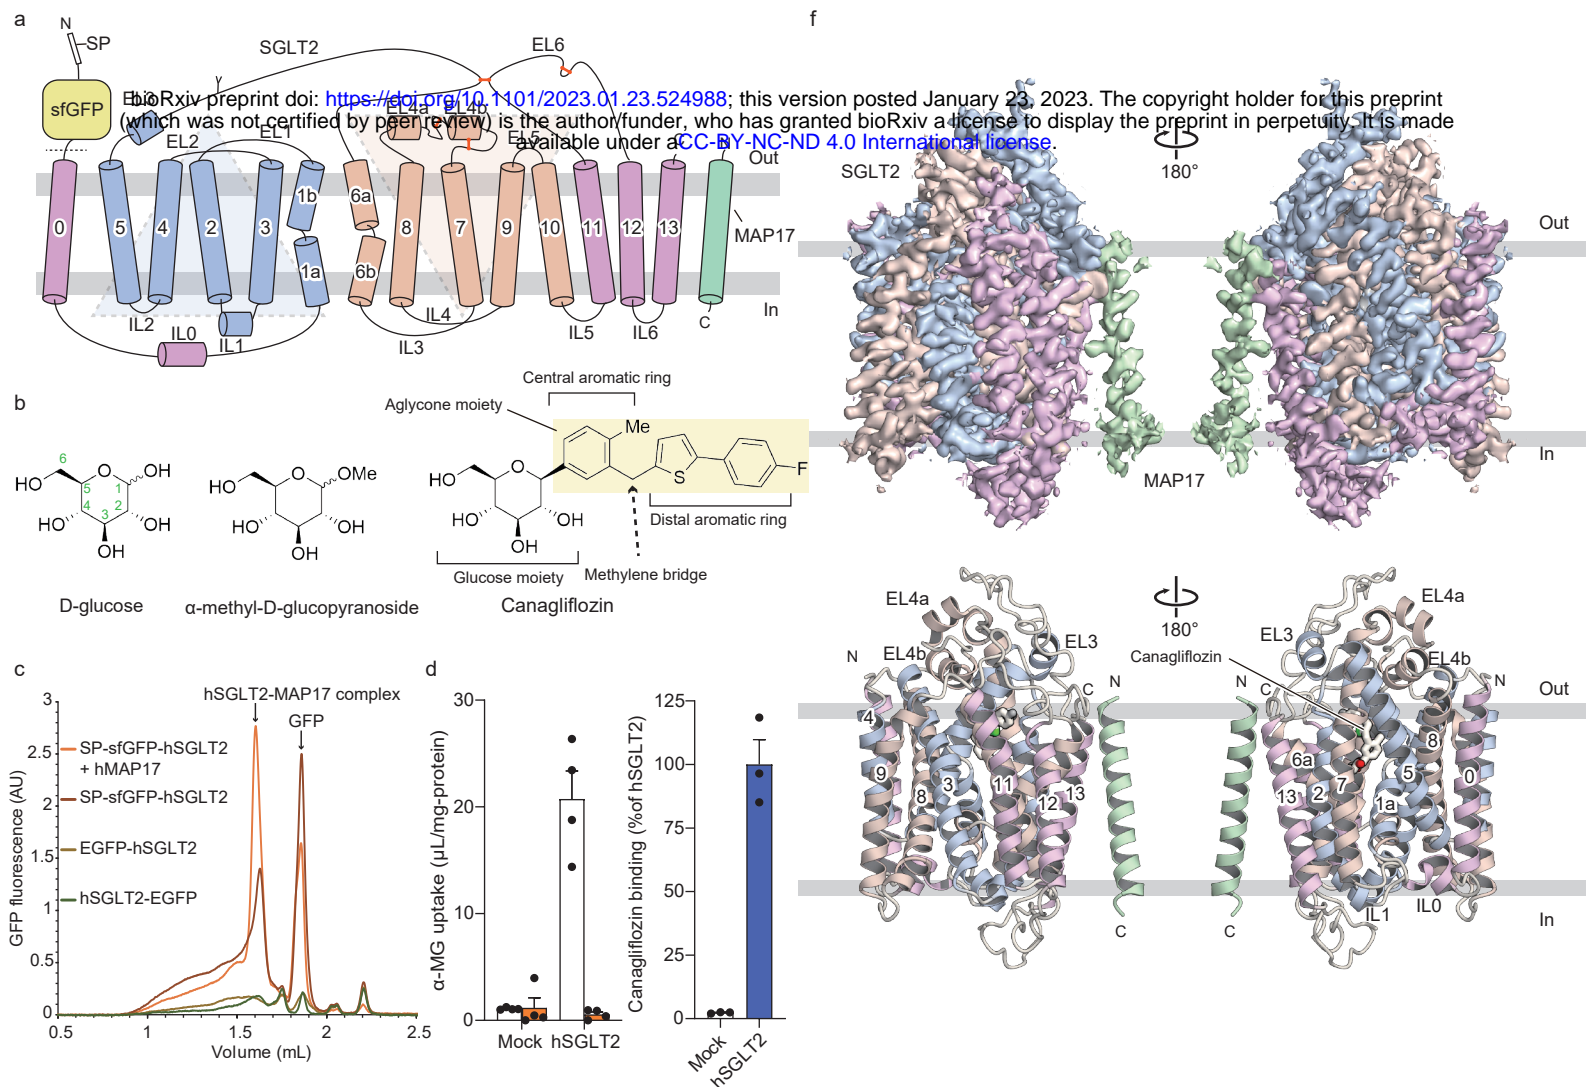

**Figure 1. Biochemical and cryo-EM studies of the human SGLT2-MAP17 heterodimer.**

a Topological diagram of the hSGLT2-MAP17 heterodimer. Inverted repeats (IRs) are represented as light blue and light brown. The Y-shape indicates an N-glycosylation site. Disulfide bonds are shown as orange sticks. A signal peptide (SP) and super-folder (sf) GFP were fused to the N-terminus of hSGLT2. The dotted line indicates the site of protease activity. b Chemical structures of the substrates and a representative gliflozin. c, FSEC profiles of various types of GFP-tagged hSGLT2 without MAP17. Arrows indicate elution positions of the hSGLT2-MAP17 heterodimer and free GFP (GFP). d  $\alpha$ -MG uptake in hSGLT2 and MAP17 expressing cells in the absence (white) or presence (orange) of 500 nM canagliflozin. Each column represents mean  $\pm$  SEM (n = 4, biological replicates). e Canagliflozin (30 nM) binding assay for the hSGLT2- and MAP17-expressing cell membrane fraction. Each column represents mean  $\pm$  SEM (n = 3, technical replicates). f, Overall structure of the human SGLT2-MAP17 complex. Cryo-EM maps (top) and ribbon models (bottom). The same color scheme was used throughout the manuscript, except for Fig. 4.

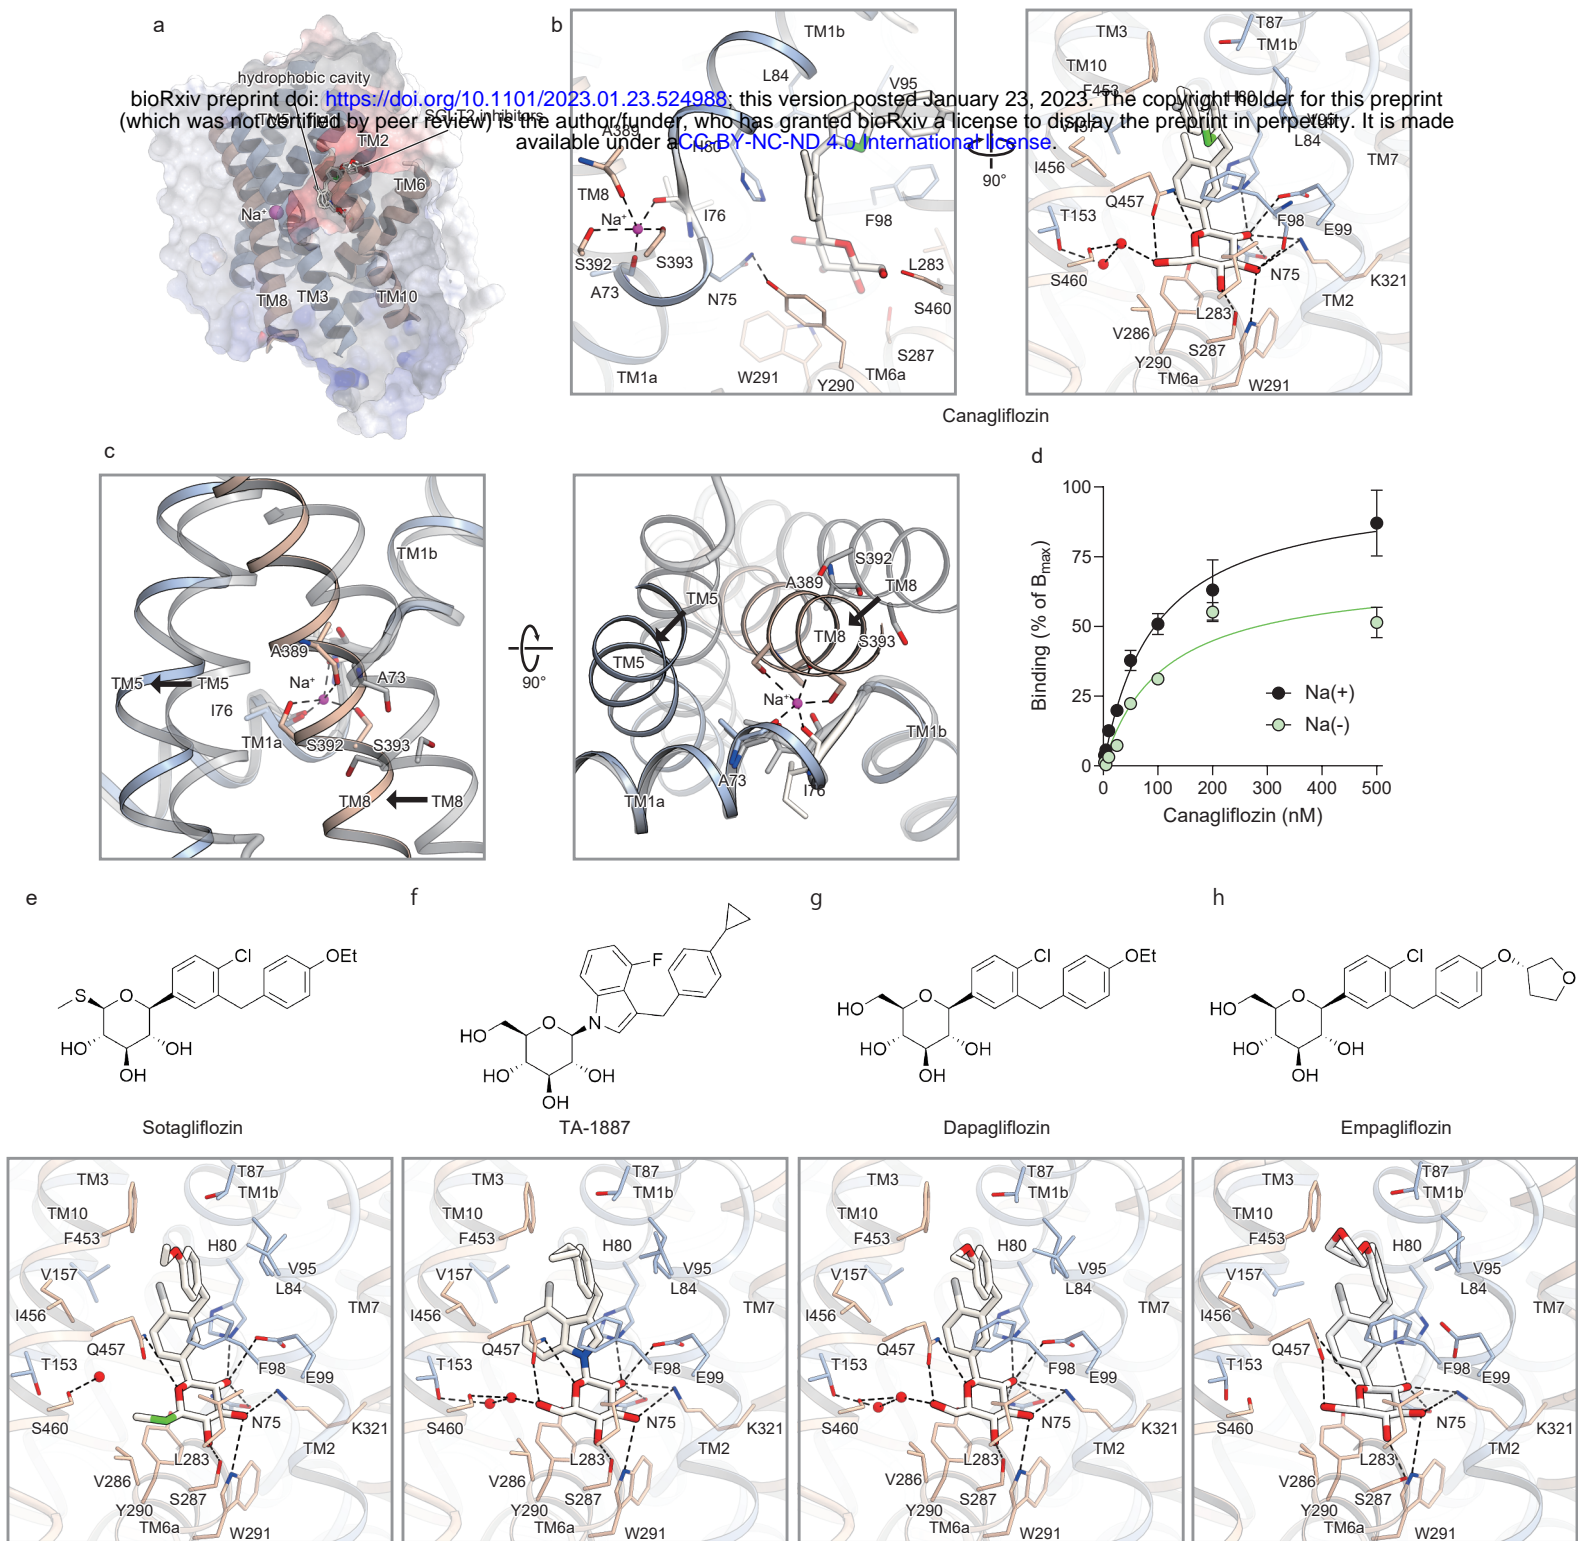

**Figure 2. SGLT2-inhibitor-binding site of the outward-facing conformation.**

a, Cross-sections of the electrostatic surface potentials at the SGLT2 inhibitor-binding site. The potentials were displayed as a color gradient from red (negative) to blue (positive). b, Interactions between canagliflozin and hSGLT2. Canagliflozin and its interacting residues are shown as sticks. The hydrogen bonds are indicated by the black dashed lines. c, Conformation change from outward-opening (color) to inward-opening (grey) around the Na<sub>2</sub> binding site. View from the lateral side of the plasma membrane (left) and from the cytoplasmic side (right). d, Concentration-dependent binding evaluation of canagliflozin in the presence and absence of Na<sup>+</sup>. Each point represents the mean ± SEM (n = 3, technical replicates). e–h, Chemical structures of inhibitors and their interactions with hSGLT2: sotagliflozin (e), TA-1887 (f), and dapagliflozin (g) in this study, and of empagliflozin (h) (previously reported; <sup>19</sup>).



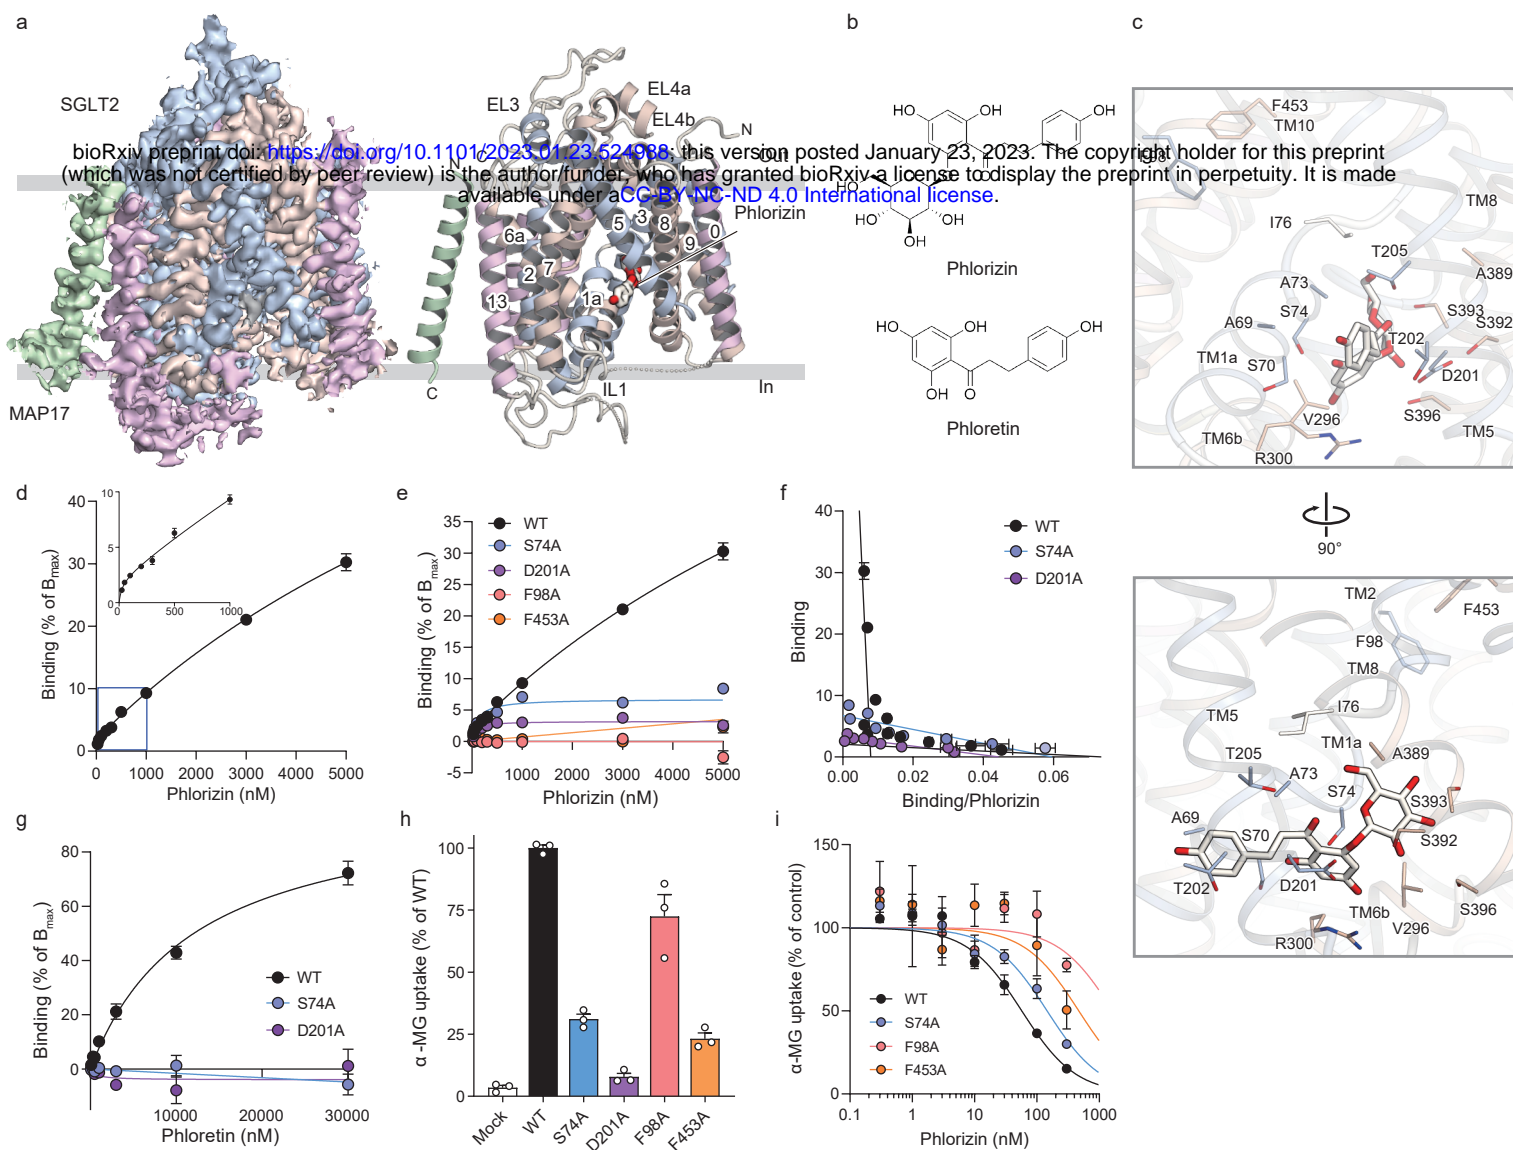

**Figure 3. Phlorizin binding site of the inward-open conformation.**

a, The inward-open conformation of the hSGLT2–MAP17 complex. Cryo-EM maps (left) and ribbon models (right). b, Chemical structures of phlorizin and phloretin. c, Interactions between phlorizin and hSGLT2. d, Concentration-dependent binding of phlorizin to the wild-type hSGLT2. Each point represents the mean  $\pm$  SEM ( $n = 3$ , technical replicates). e, Concentration-dependent binding of phlorizin in wild-type and mutant hSGLT2. Each point represents the mean  $\pm$  SEM ( $n = 3$ , technical replicates). f, Eadie-Hofstee plot analysis of phlorizin binding in wild-type and mutant hSGLT2. Each point represents the mean  $\pm$  SEM ( $n = 3$ , technical replicates). g, Concentration-dependent binding of phloretin in wild-type and mutant hSGLT2. Each point represents the mean  $\pm$  SEM ( $n = 3$ , technical replicates). h, Uptake assay of  $\alpha$ -MG in wild-type and mutant hSGLT2. Each column represents mean  $\pm$  SEM ( $n = 4$ , biological replicates). i, Inhibitory effect of phlorizin on  $\alpha$ -MG uptake by wild-type and mutant hSGLT2. Each point represents the mean  $\pm$  SEM ( $n = 4$ , biological replicates).

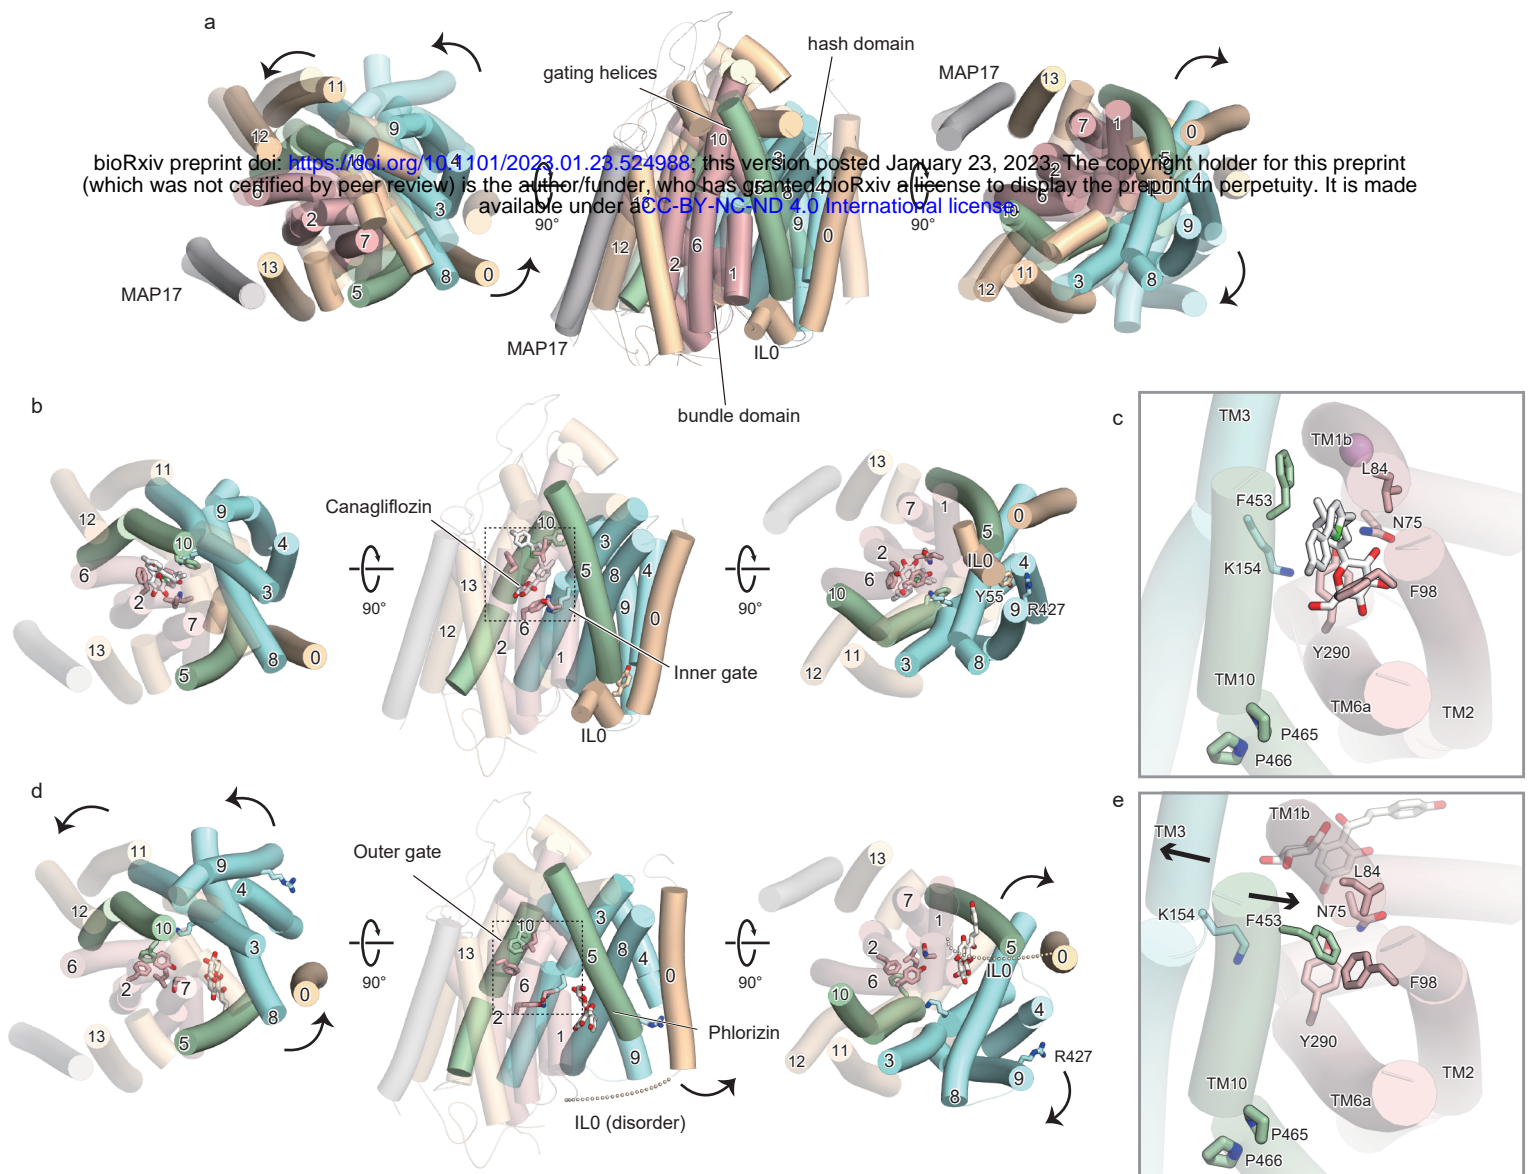

**Figure 4. Comparison of the outward-facing and inward-open conformations of hSGLT2.**

a, The outward-facing (colored) and inward-open (transparent) structures when their bundle domains (TM1, -2, -6, and -7; red) are superimposed. MAP17 (grey) and TM13 (light orange) overlap well between the conformations, but the hash domain (TM3, -4, -8, -9; blue), gate helices (TM5, -10; green), TM0, -11 and -12 (light orange) are in the inward-opening conformation. b, The outward-facing conformation of the hSGLT2–MAP17 complex with canagliflozin viewed from the exoplasm (left), side (center), and cytoplasm (right). c, Substrate sugar-binding site and external vestibule of the outward-facing conformation from the exoplasm. d, The inward-open conformation of the hSGLT2–MAP17 complex with phlorizin viewed from the exoplasm (left), side (center), and cytoplasm (right). e, Substrate sugar-binding site and external vestibule of the inward-open conformation from the exoplasm.

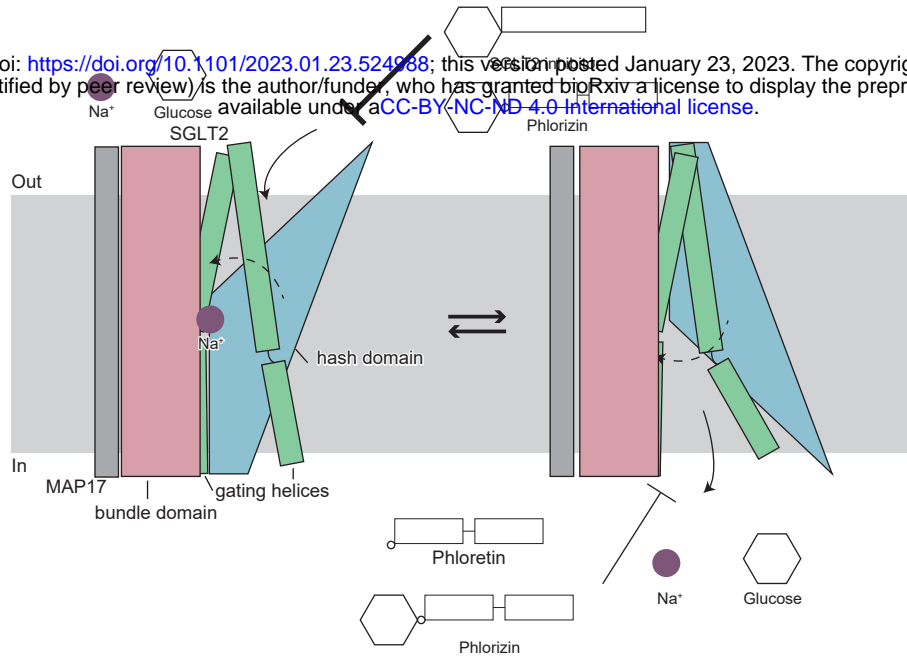

**Figure 5. Proposed SGLT2 transport and inhibition mechanism.**

The bundle domain is anchored to the membrane with MAP17, and the rest of the transporter undergoes a conformational change according to an alternating-access mechanism. Upon sodium binding, the transporter opens outward to allow a substrate or inhibitors to bind. Upon substrate binding, the inner gate opens and sodium and glucose are released into the cell. After sodium and glucose are released, the transporter forms an inward-open structure and phlorizin and phloretin bind to this structure, inhibiting glucose transport.
