# Supplementary material for: Structural insights into the mechanism of the human SGLT2–MAP17 glucose transporter
Source: bioRxiv or medRxiv preprint supplement (doi:10.1101/2023.01.23.524988), 2023-01-23
Supplement: Supplementary file [file media-1.pdf]

## Supplementary Information

### Structural insights into the mechanism of the human SGLT2–MAP17 glucose transporter

Masahiro Hiraizumi<sup>1,4,†,\*</sup>, Tomoya Akashi<sup>2,4</sup>, Kouta Murasaki<sup>1</sup>, Hiroyuki Kishida<sup>1</sup>, Taichi Kumanomidou<sup>1</sup>, Nao Torimoto<sup>1</sup>, Osamu Nureki<sup>3,\*</sup>, and Ikuko Miyaguchi<sup>1,\*</sup>

<sup>1</sup>Discovery Technology Laboratories Sohyaku Innovative Research Division, Mitsubishi Tanabe Pharma Co., LTD., 1000, Kamoshida cho, Aoba ku, Yokohama 227 0033, Japan

<sup>2</sup>DMPK Research Laboratories Sohyaku Innovative Research Division, Mitsubishi Tanabe Pharma Co., LTD., 1000, Kamoshida-cho, Aoba-ku, Yokohama 227-0033, Japan

<sup>3</sup>Department of Biological Sciences, Graduate School of Science, The University of Tokyo, 7-3-1 Hongo, Bunkyo-ku, Tokyo 113-0033, Japan

<sup>4</sup>Co-first authors

\*Corresponding authors

†Current address: Department of Chemistry and Biotechnology, Graduate School of Engineering, The University of Tokyo

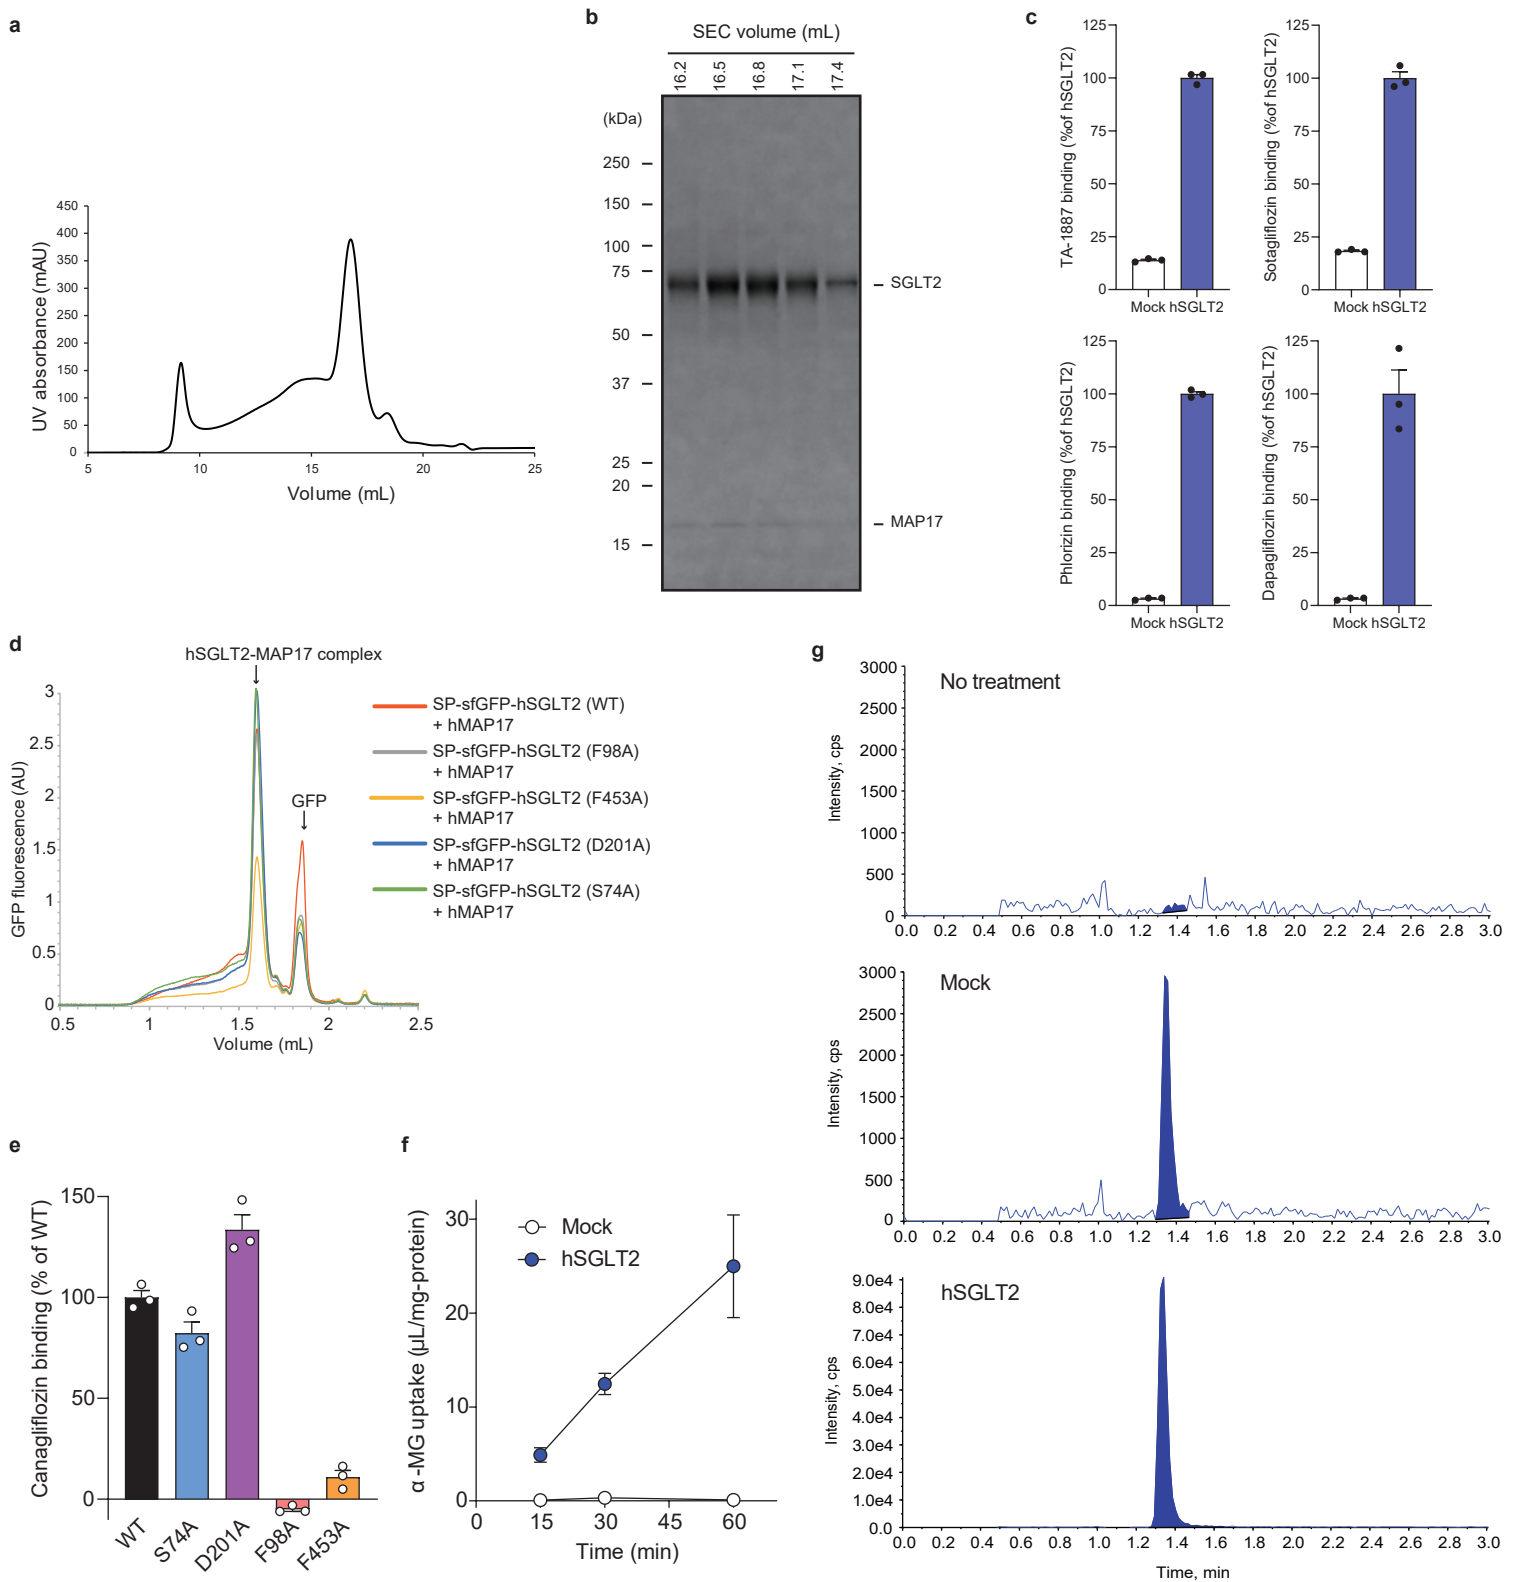

### Supplementary Figure 1. Biochemical characterization of the hSGLT2–MAP17 complex.

(a) Representative size-exclusion chromatography profile of hSGLT2–MAP17. (b) SDS-PAGE analysis of the hSGLT2–MAP17 peak fractions via size-exclusion chromatography (SEC) purification. (c) SGLT2 inhibitors (25 nM) binding to the crude membrane expressing hSGLT2 and MAP17 ( $n = 3$ , technical replicates). (d) FSEC profiles for various mutations of sfGFP-tagged hSGLT2 with MAP17. The arrows indicate the elution positions of the hSGLT2–MAP17 heterodimer and the free GFP (GFP). (e) Canagliflozin binding to the crude membrane expressing wild-type hSGLT2 and mutants. Crude membranes were incubated with 30 nM canagliflozin and binding was measured by LC-MS/MS. Data are shown as mean  $\pm$  SEM ( $n = 3$ , technical replicates). (f) Time-course of hSGLT2-mediated  $\alpha$ -MG uptake.  $\alpha$ -MG uptake (500  $\mu$ M) by hSGLT2-expressing cells and mock cells was examined. Each point represents mean  $\pm$  SEM ( $n = 4$ , biological replicates). (g) Chromatograms of  $\alpha$ -MG in the lysates of untreated mock cells (No treatment), mock cells incubated with  $\alpha$ -MG (Mock), and hSGLT2- and MAP17-expressing cells incubated with  $\alpha$ -MG (hSGLT2).

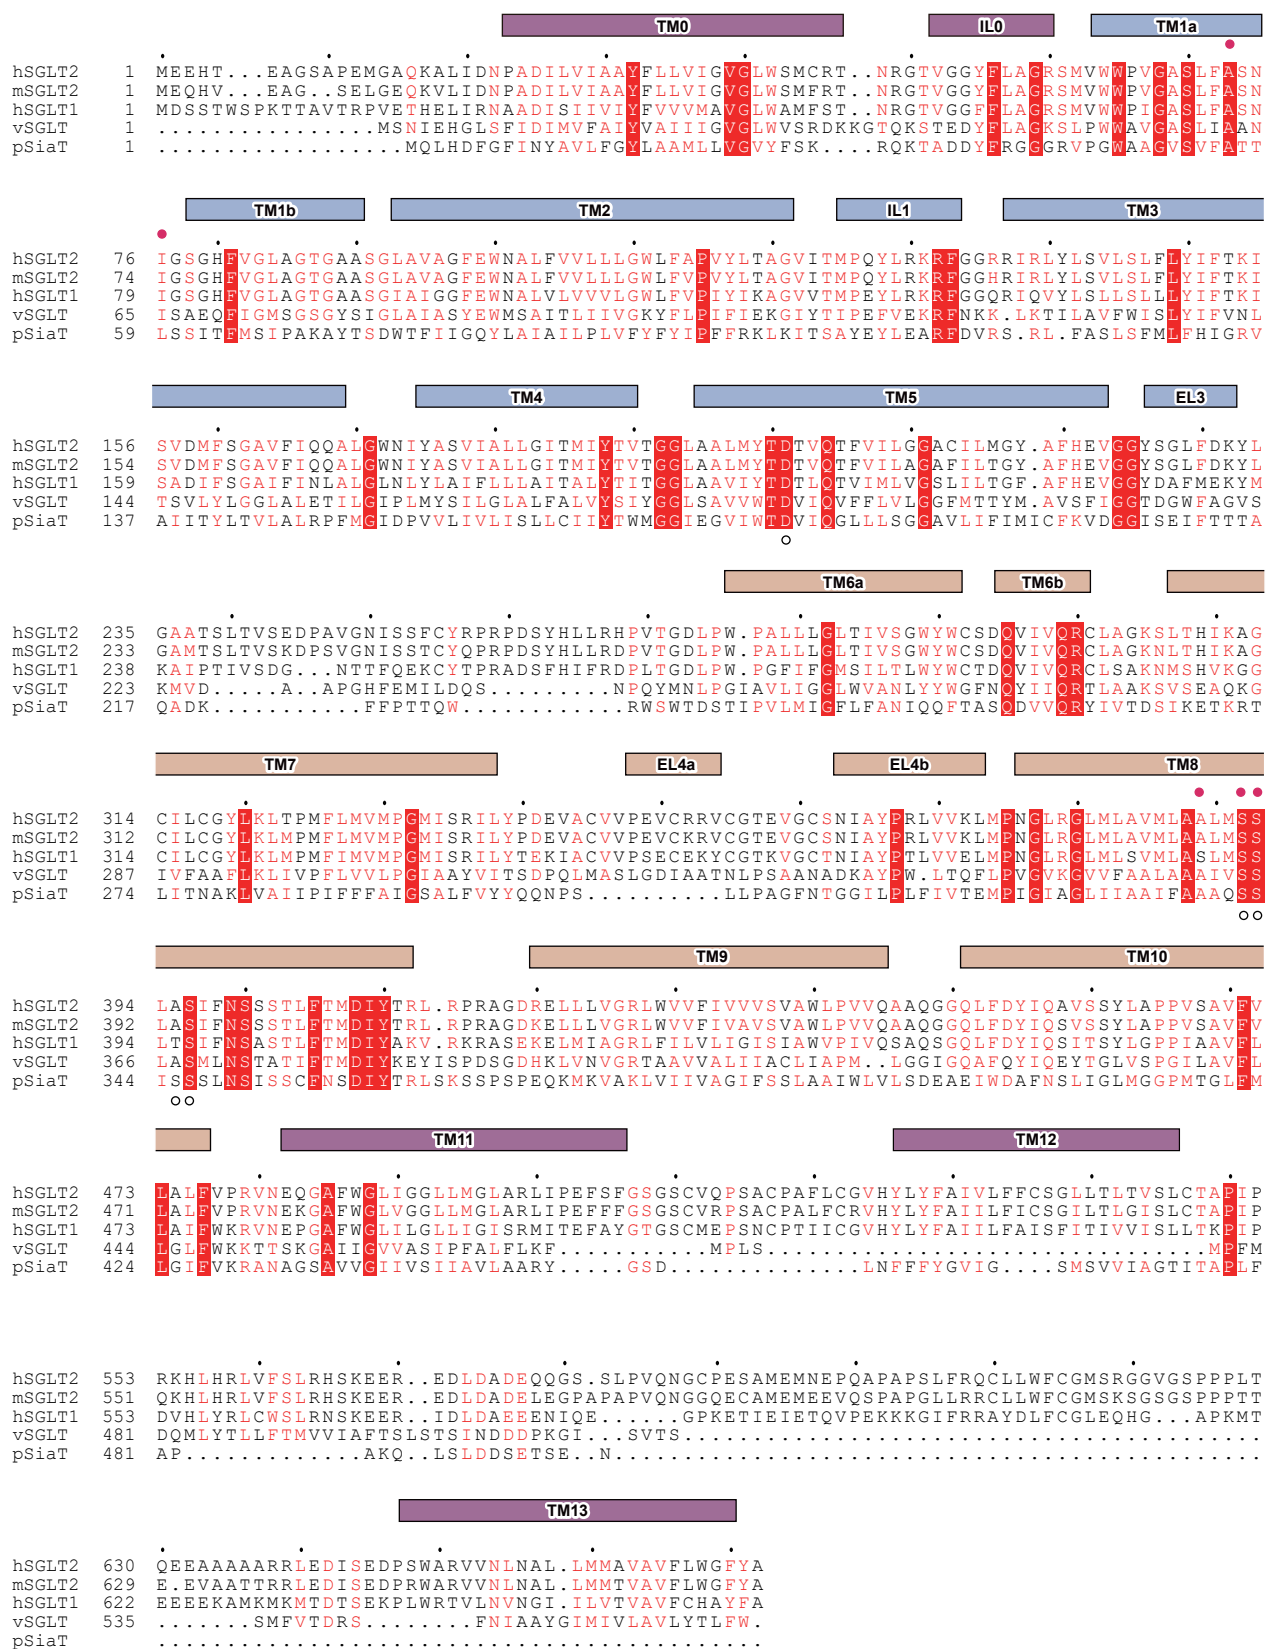

### Supplementary Figure 2. Sequence alignment of SGLT.

Sequence alignment of hSGLT2 (UniProt: P31639), mSGLT2 (UniProt: Q92317), hSGLT1 (UniProt: P13866), *Vibrio parahaemolyticus* SGLT (UniProt: P96169), and *Proteus mirabilis* HI4320 sialic acid symporter (UniProt: B4EZY7), performed using Clustal Omega. Conserved transmembrane helices of hSGLT2 are indicated above the sequence. The similarly conserved residues are indicated by red letters. The residues at the conserved Na<sub>2</sub> and Na<sub>3</sub> sites of SGLT are highlighted with pink circles above or white circles below the alignment, respectively.

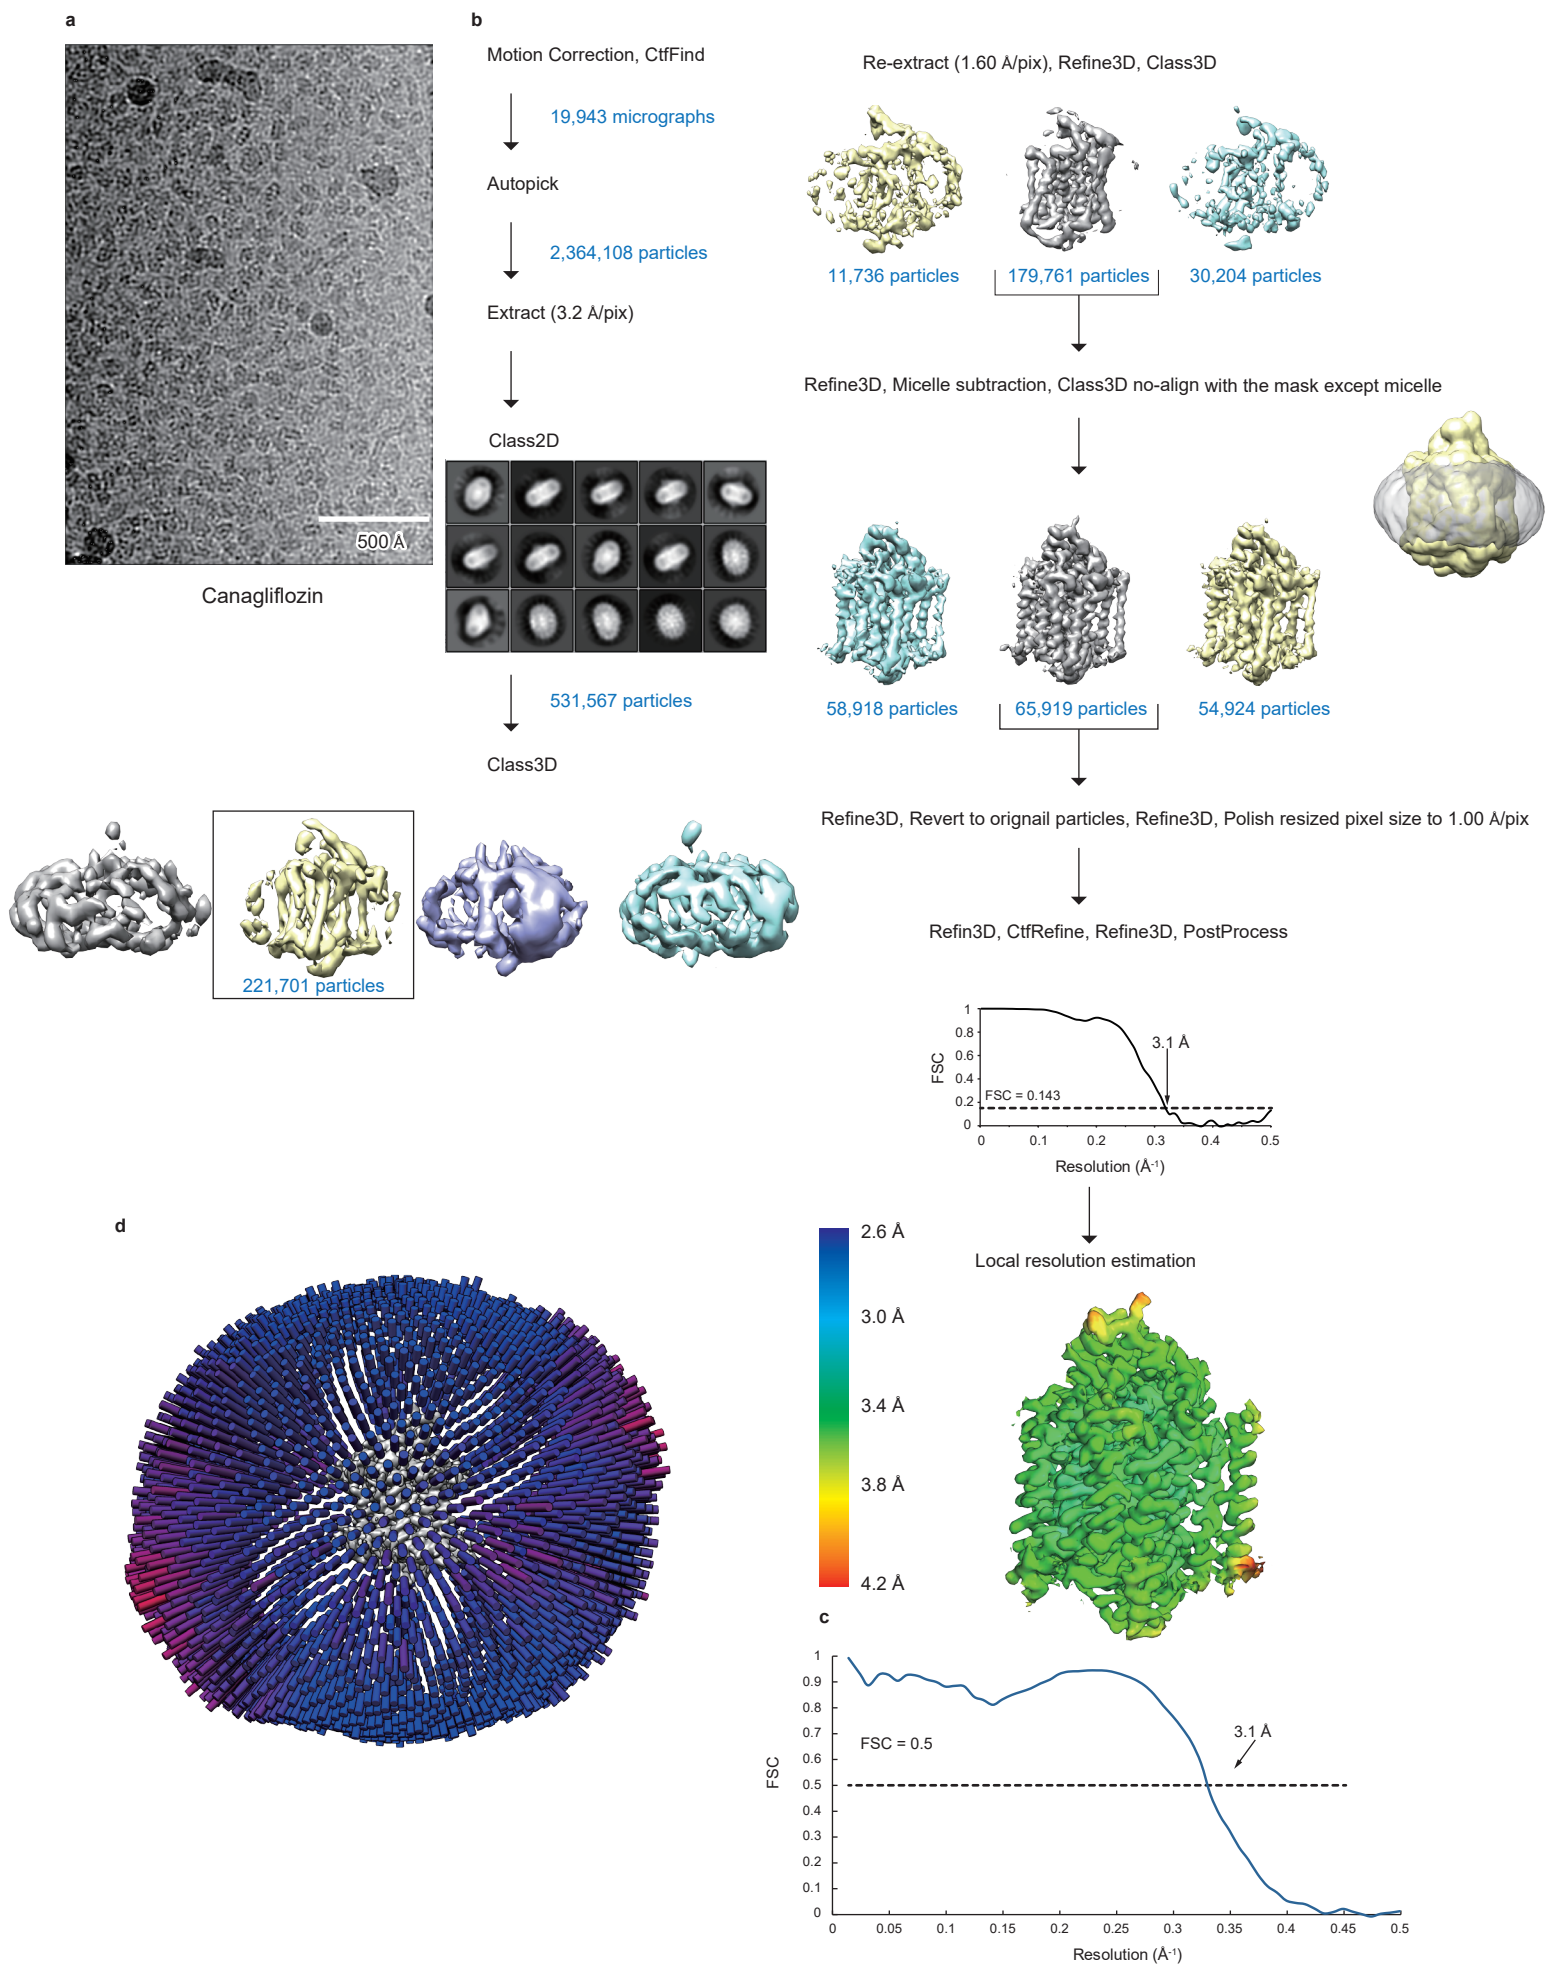

**Supplementary Figure 3. Data processing of the canagliflozin-bound state.**

(a) Representative cryo-EM image of the hSGLT2-MAP17 complex in the presence of canagliflozin. (b) Data processing workflow of single-particle image-processing and local-resolution analysis. Particles were separated into three groups via non-aligned 3D classification, with the mask (without micelles) shown in yellow. (c) Cross-validation FSC curves for map-to-model fitting. (d) Angular distributions of the final reconstruction.



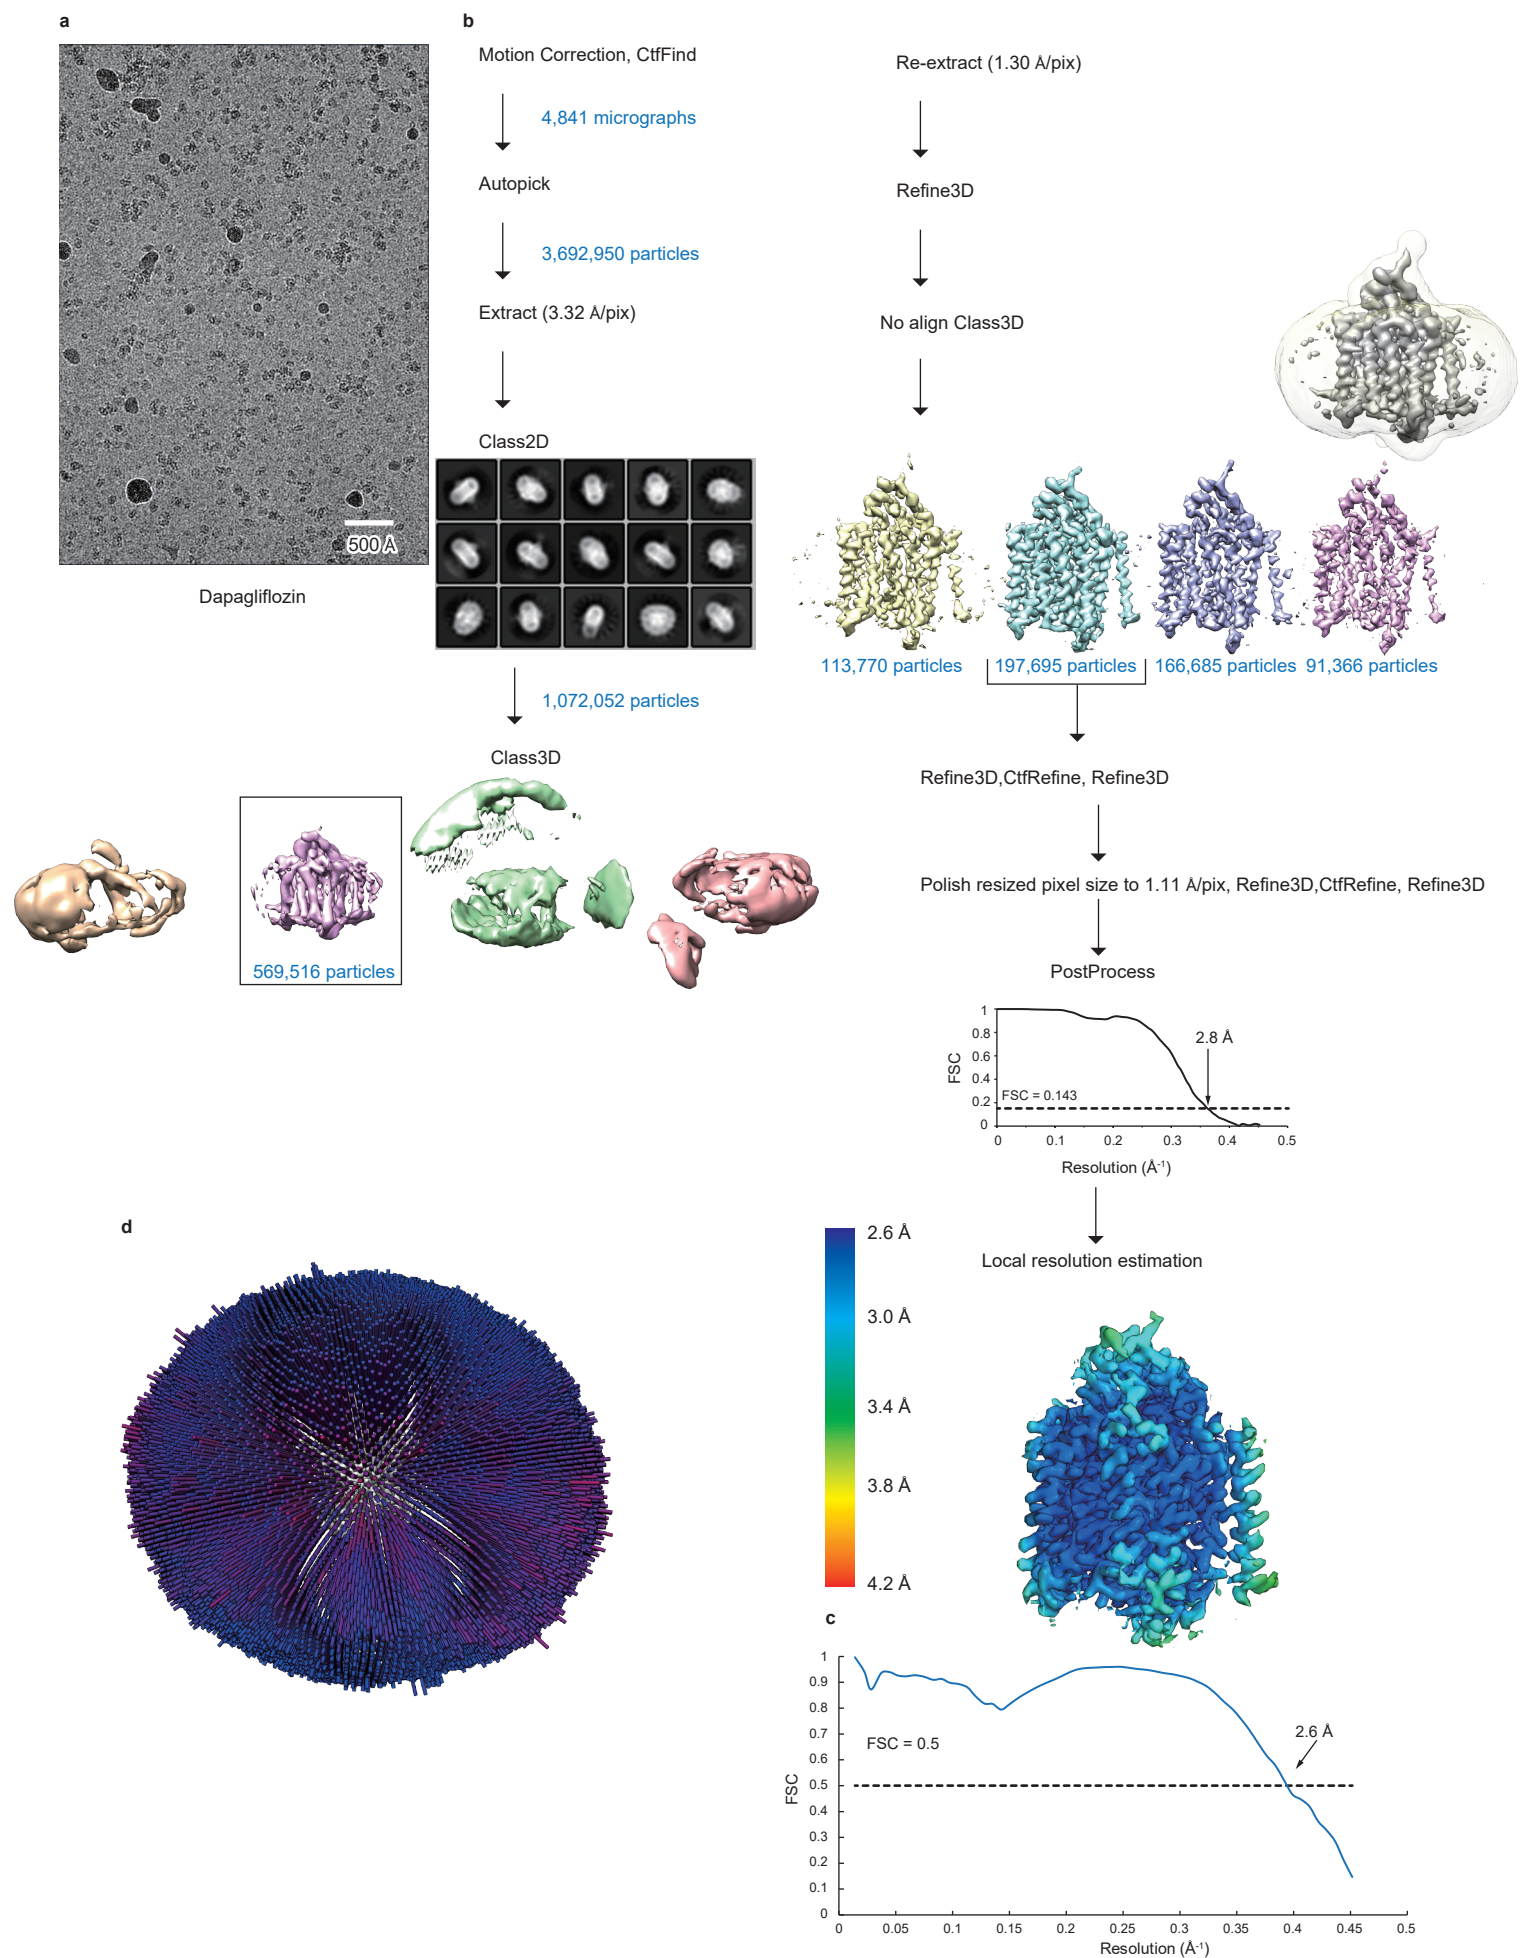

**Supplementary Figure 4. Data processing of the dapagliflozin-bound state.**

(a) Representative cryo-EM image of the hSGLT2-MAP17 complex in the presence of dapagliflozin. (b) Data processing workflow of single-particle image-processing and local-resolution analysis. Particles were separated into four groups by non-aligned 3D classification, with the mask (without micelles) shown in transparent white. (c) Cross-validation FSC curves for map-to-model fitting. (d) Angular distributions of the final reconstruction.

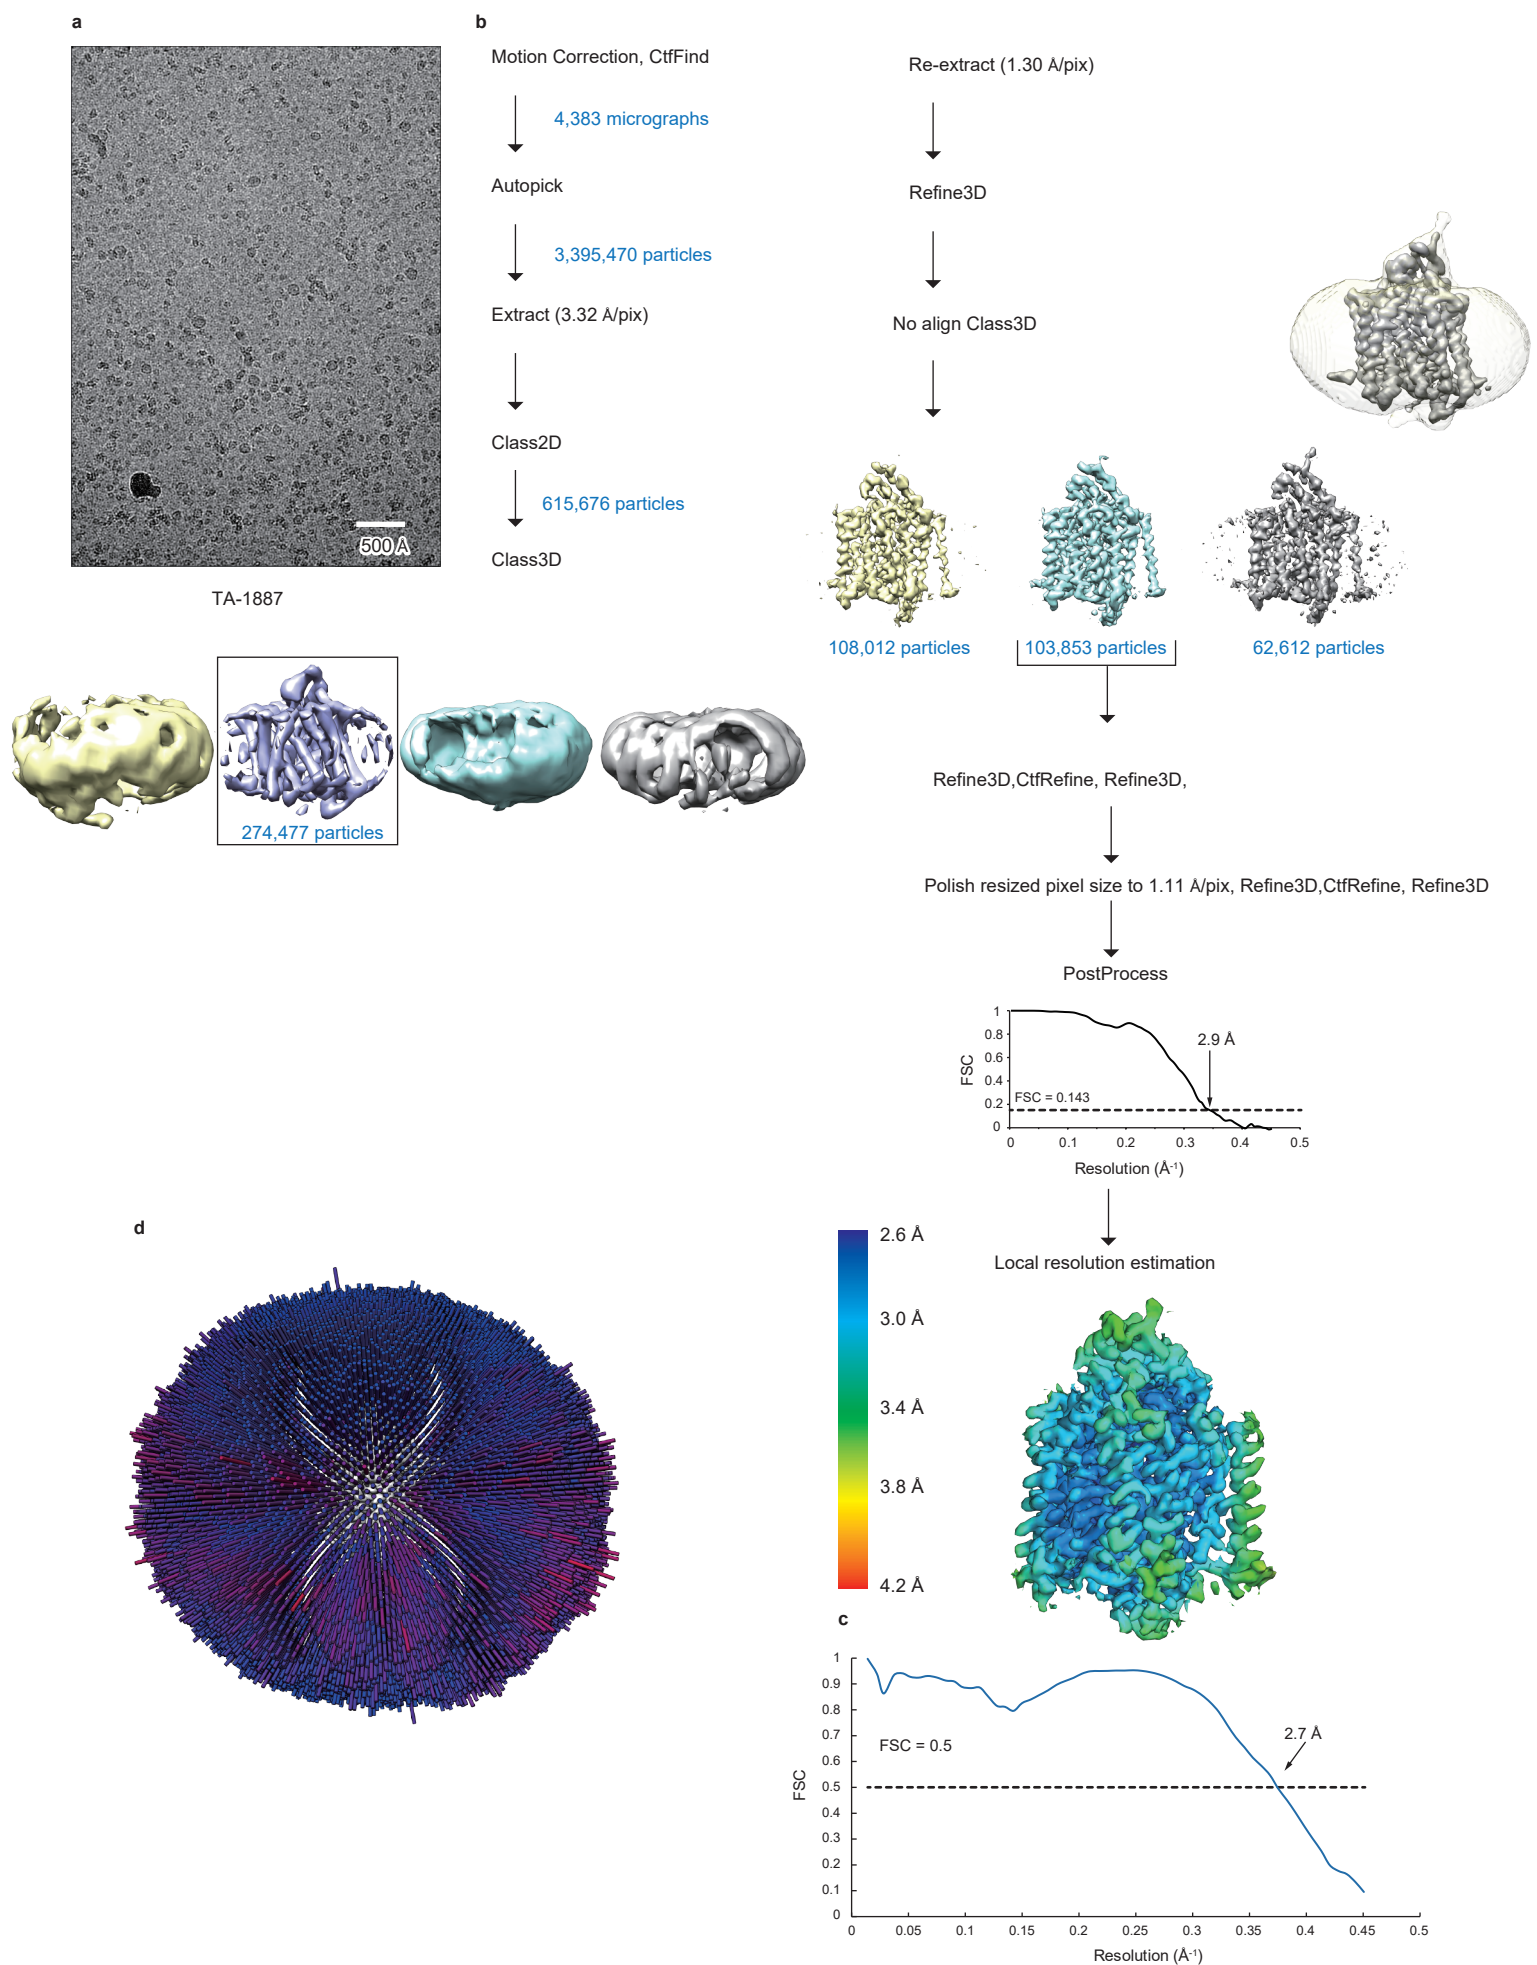

**Supplementary Figure 5. Data processing of the TA-1887-bound state.**

(a) Representative cryo-EM image of the hSGLT2–MAP17 complex in the presence of TA-1887. (b) Data processing workflow of single-particle image-processing and local-resolution analysis. Particles were separated into three groups via non-align 3D classification, with the mask covering the proteins and micelle shown in transparent white. (c) Cross-validation FSC curves for map-to-model fitting. (d) Angular distributions of the final reconstruction.



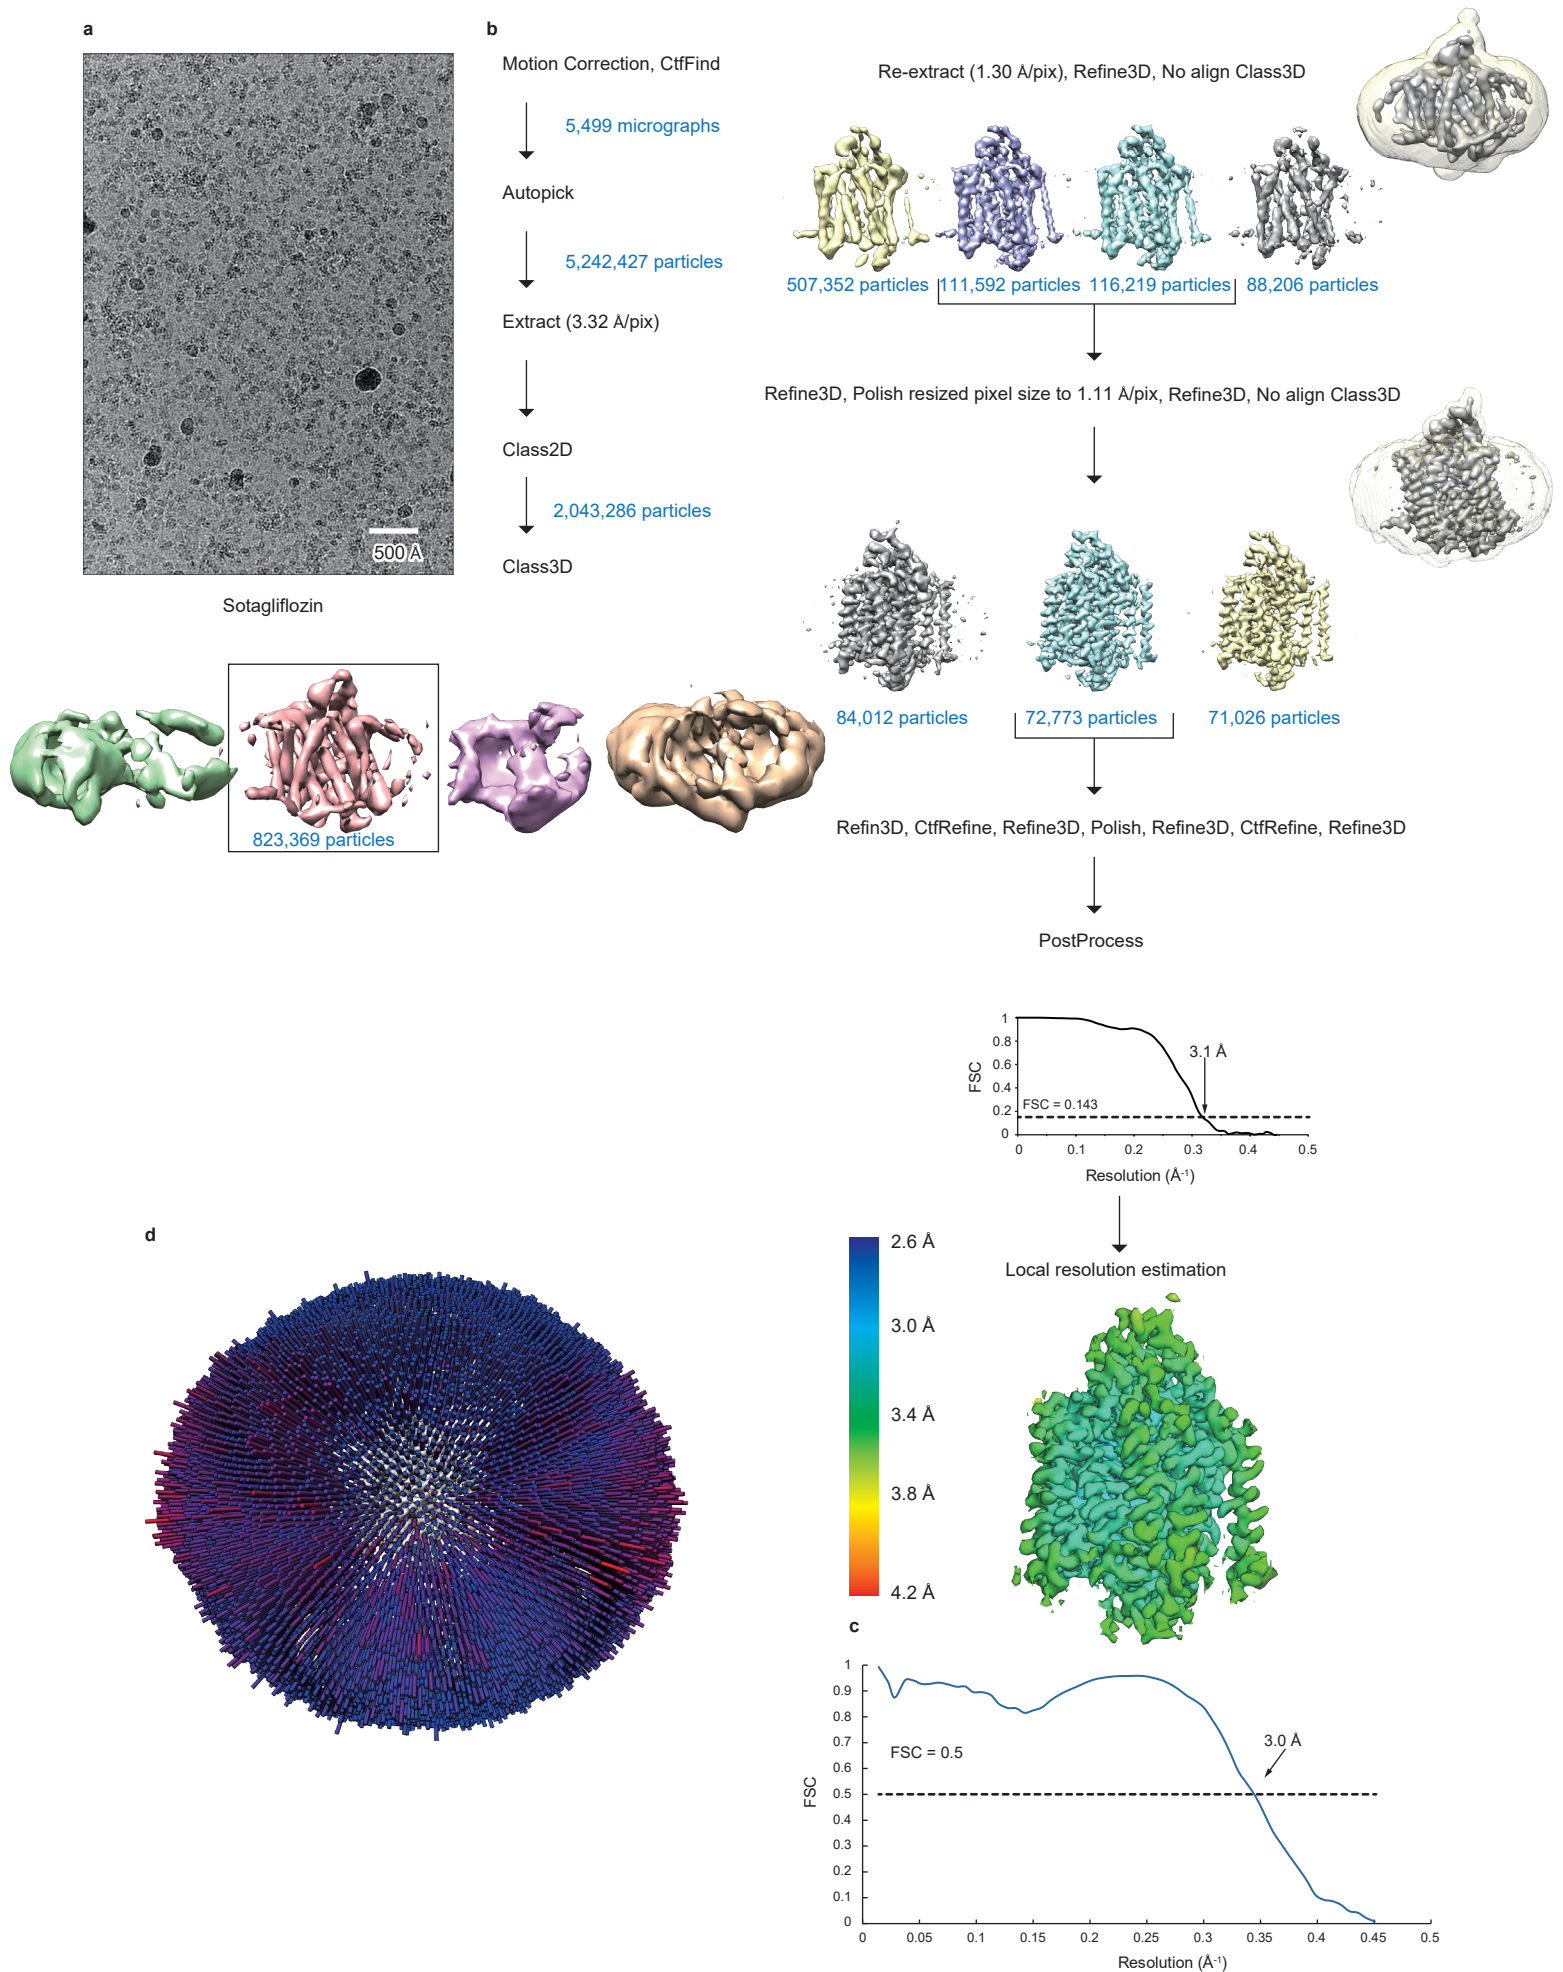

**Supplementary Figure 6. Data processing of the sotagliflozin-bound state.**

(a) Representative cryo-EM image of the hSGLT2–MAP17 complex in the presence of sotagliflozin. (b) Data processing workflow of single-particle image-processing and local-resolution analysis. Particles were separated into three groups via two rounds of non-aligned 3D classification, with the mask covering the proteins and micelles shown in transparent white. (c) Cross-validation FSC curves for map-to-model fitting. (d) Angular distributions of the final reconstruction.

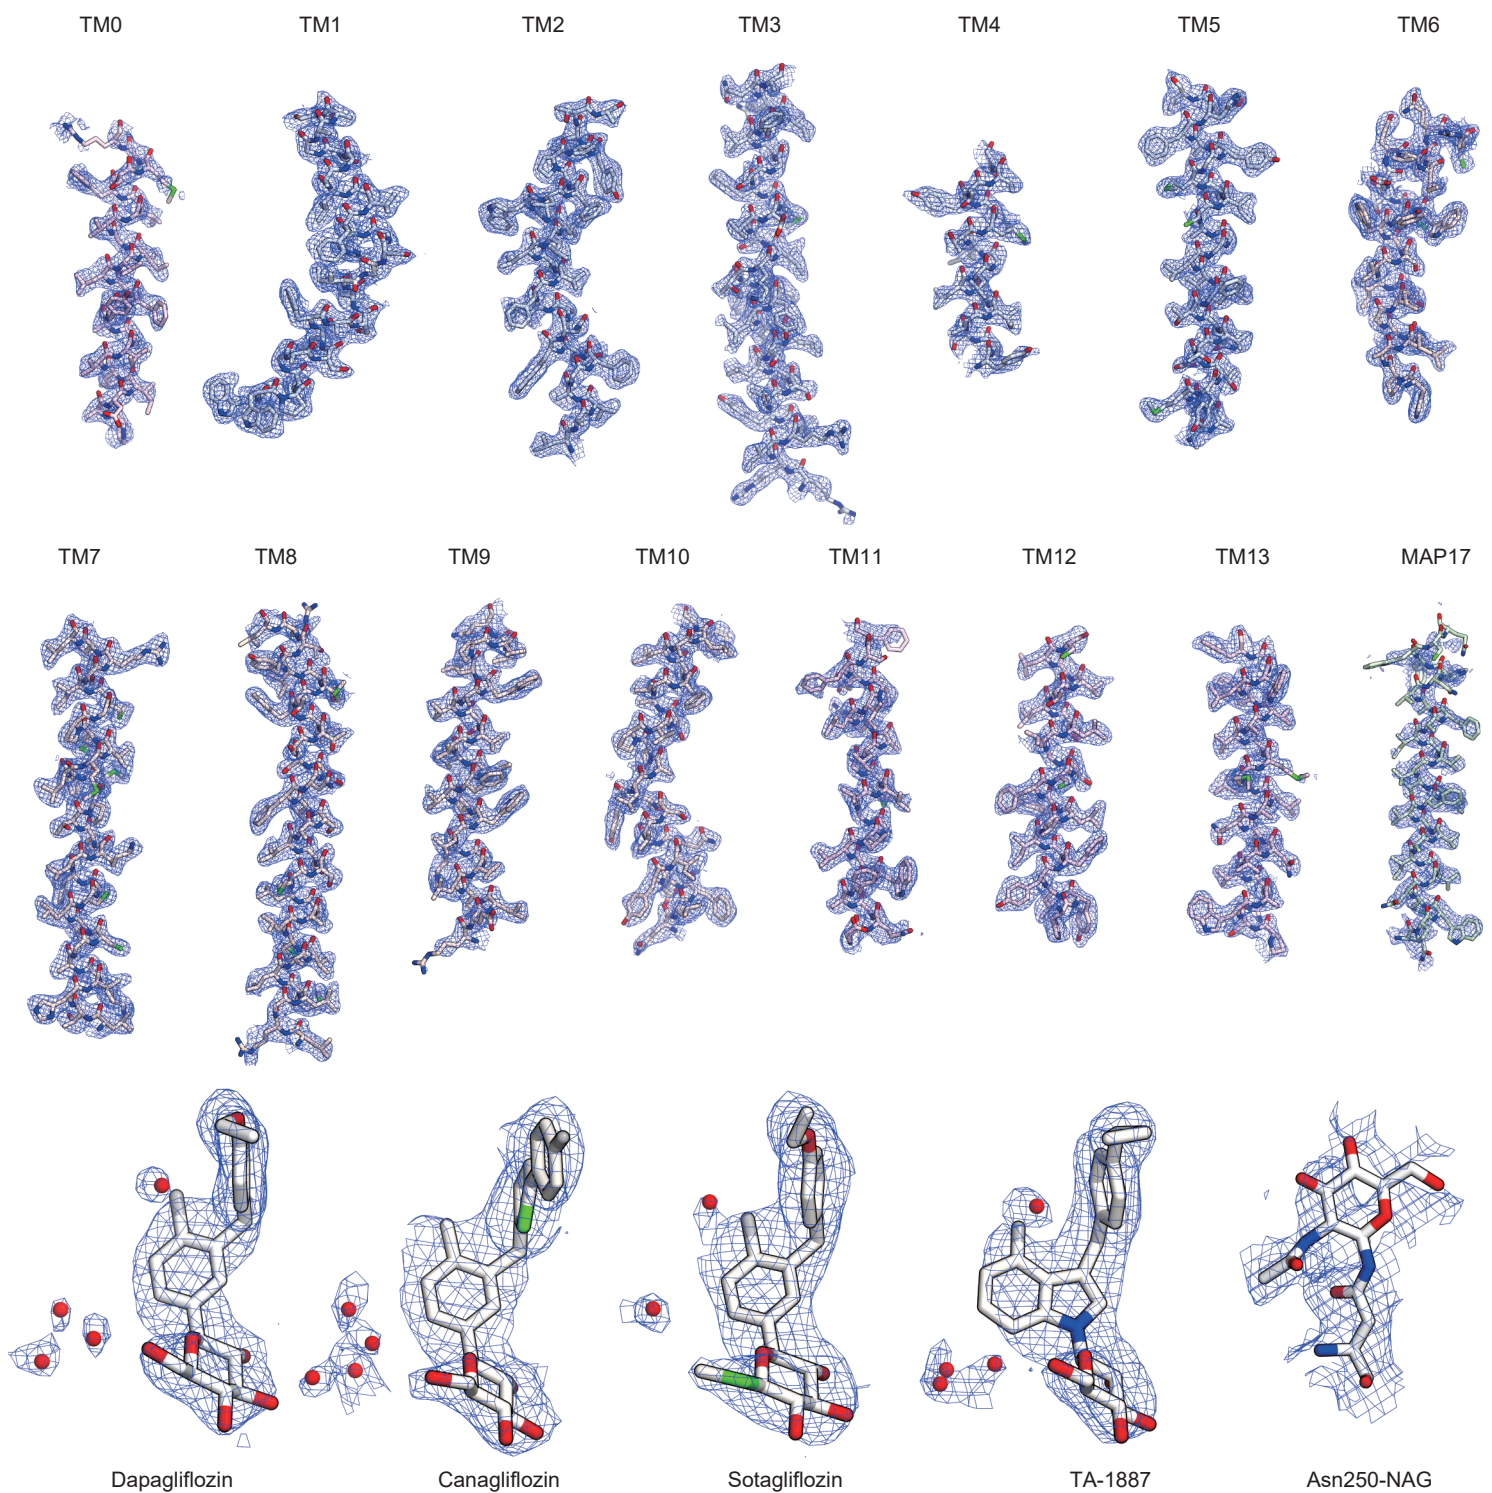

**Supplementary Figure 7. The outward-opening model of hSGLT2-MAP17 in the density maps.**

The cryo-EM density and atomic model of each segment of the outward-opening model hSGLT2-MAP17, inhibitors, and glycosylation sites, contoured to  $3.0 \sigma$ ,  $4.0 \sigma$ , and  $2.0 \sigma$ , respectively. Red spheres: water molecules around the inhibitors.



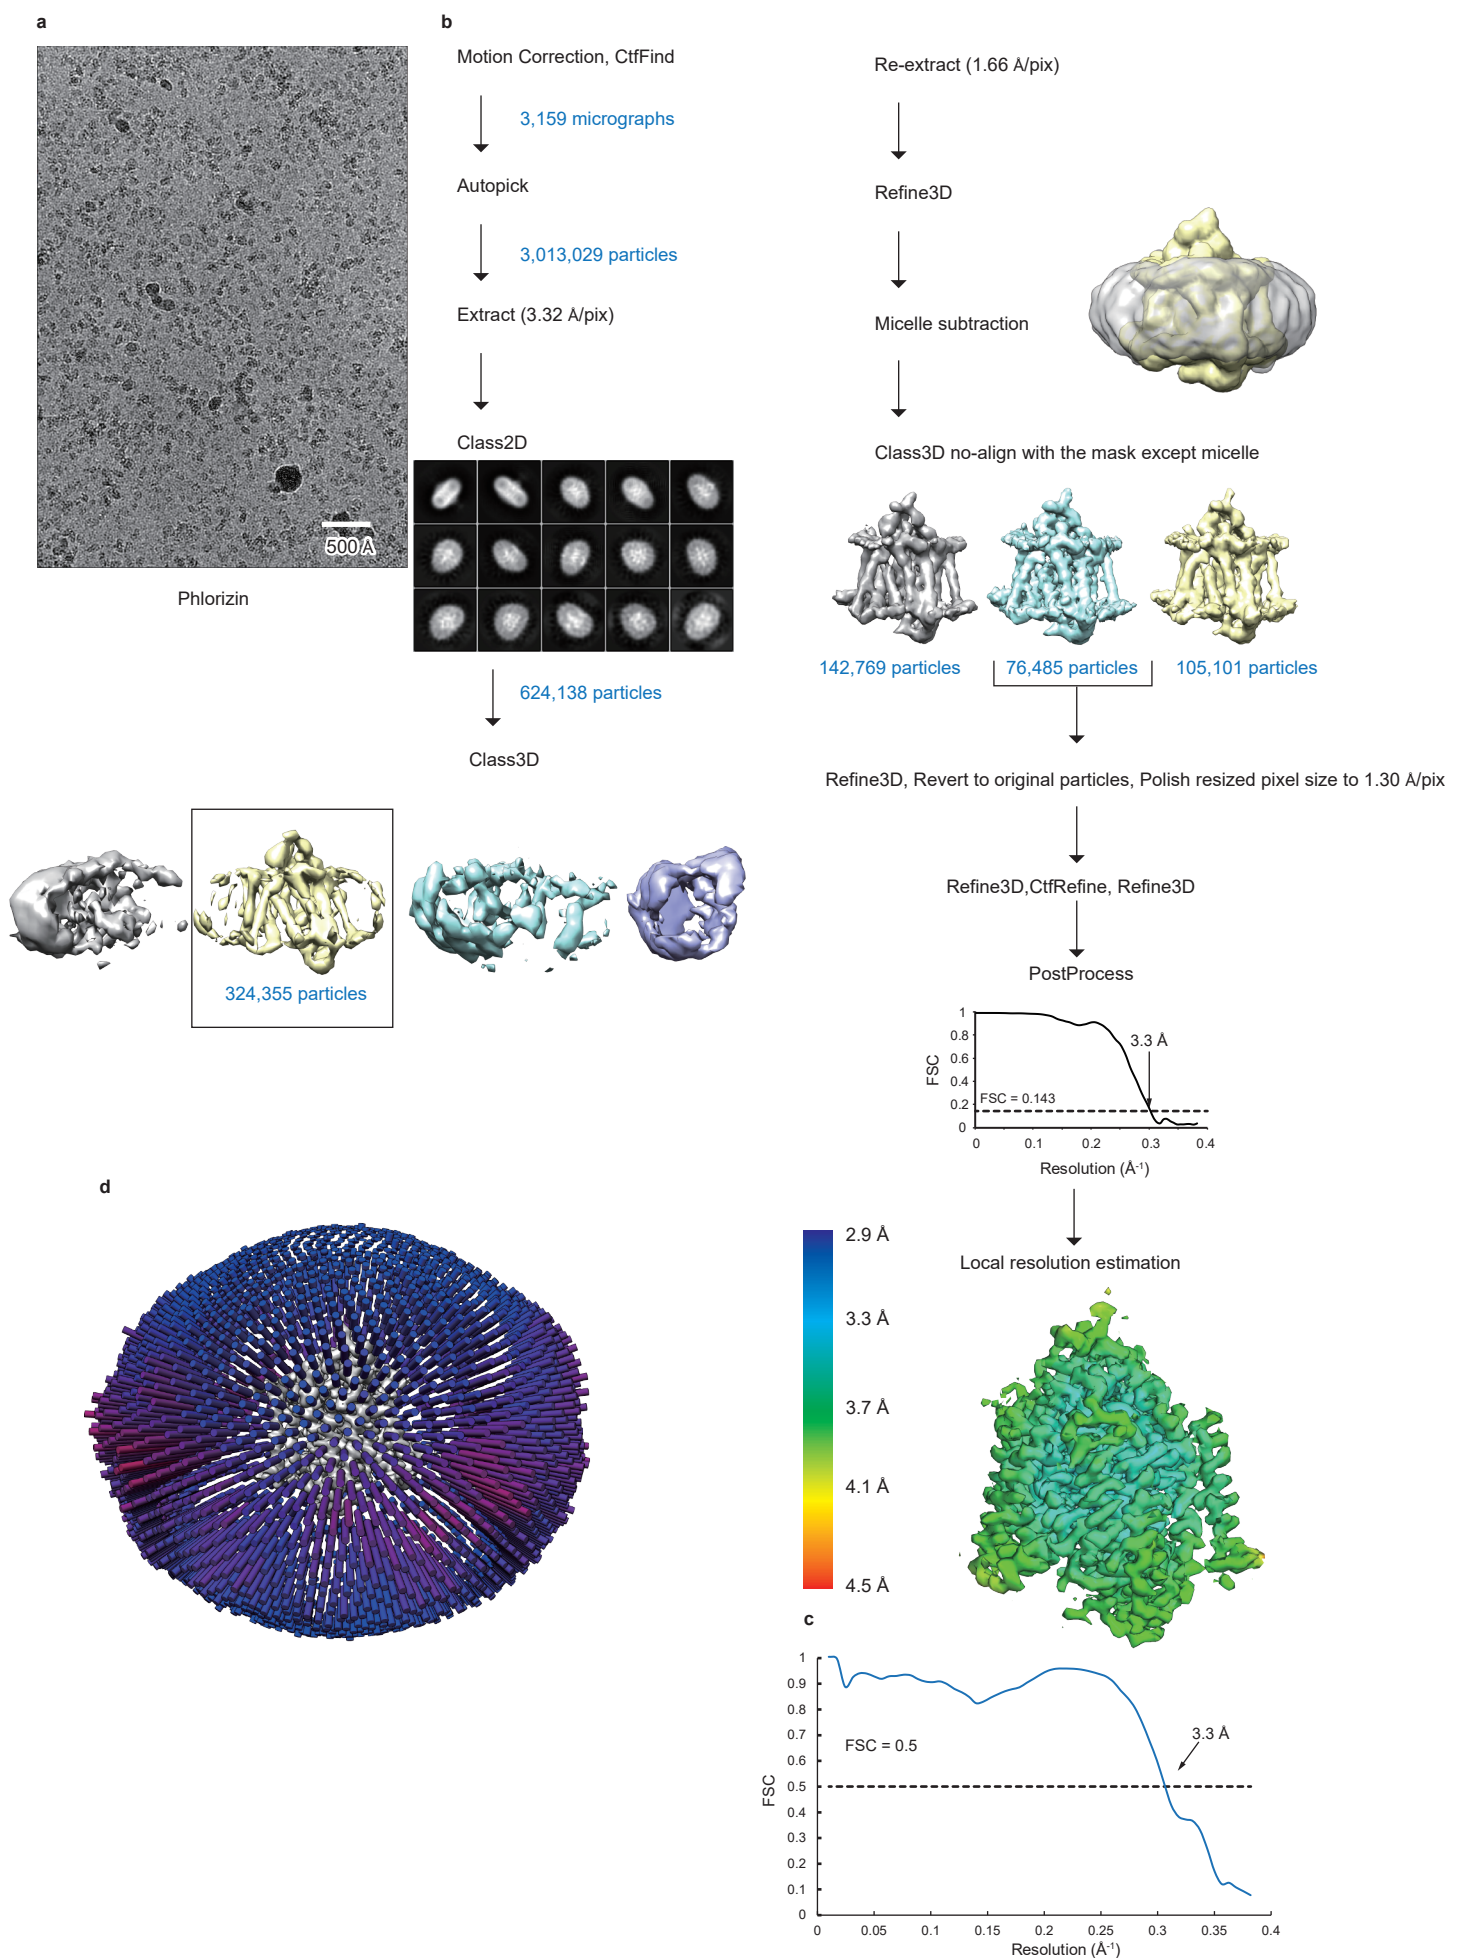

**Supplementary Figure 8. Data processing of the phlorizin-bound state.**

(a) Representative cryo-EM image of the hSGLT2-MAP17 complex in the presence of phlorizin. (b) Data processing workflow of single-particle image-processing and local-resolution analysis. Particles were separated into three groups by non-aligned 3D classification, with the mask covering the proteins (without micelles) shown in yellow. (c) Cross-validation FSC curves for map-to-model fitting. (d) Angular distributions of the final reconstruction.



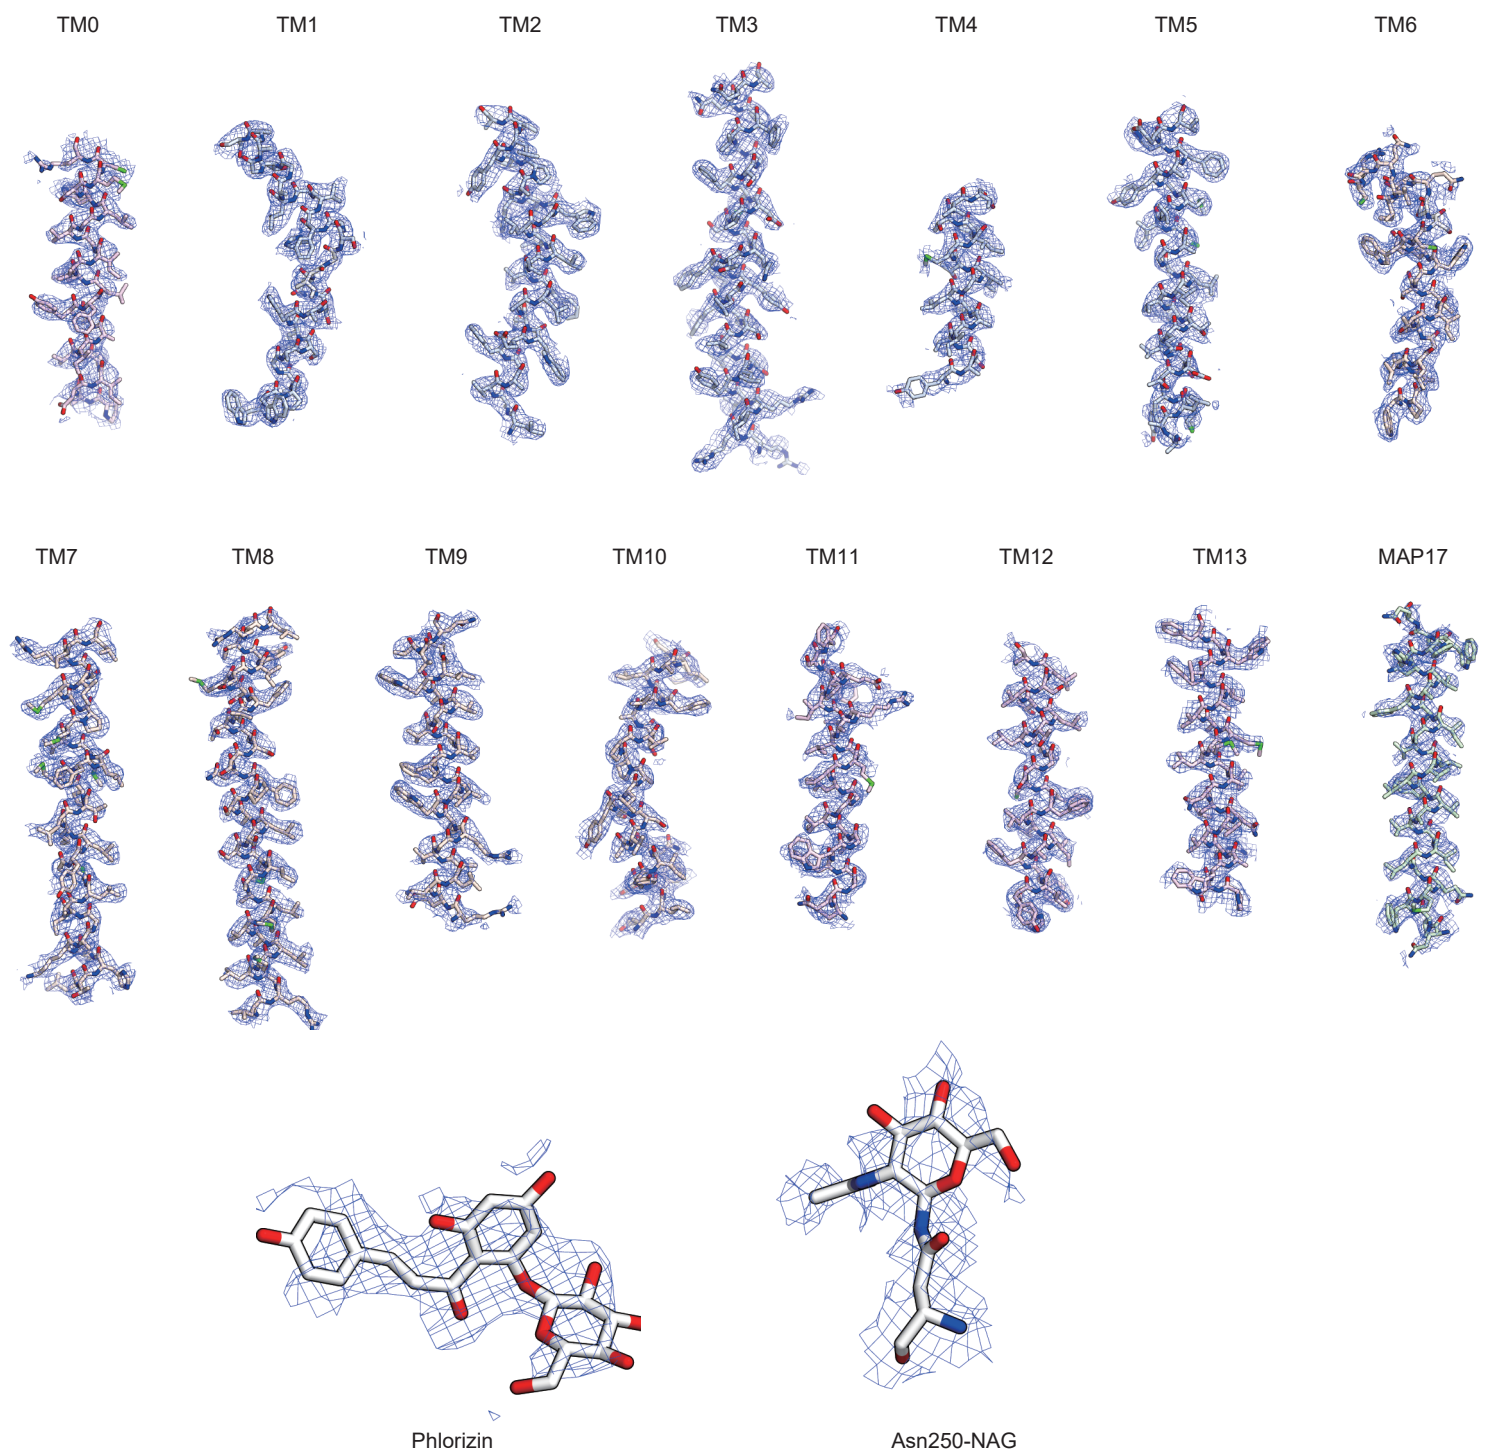

**Supplementary Figure 9. Inward-open model of hSGLT2–MAP17 in the density maps.**

The cryo-EM density and atomic models of each segment of the inward-open model of hSGLT2–MAP17, phlorizin, and glycosylation sites, contoured to  $2.9 \sigma$ ,  $2.7 \sigma$ , and  $2.7 \sigma$ , respectively.

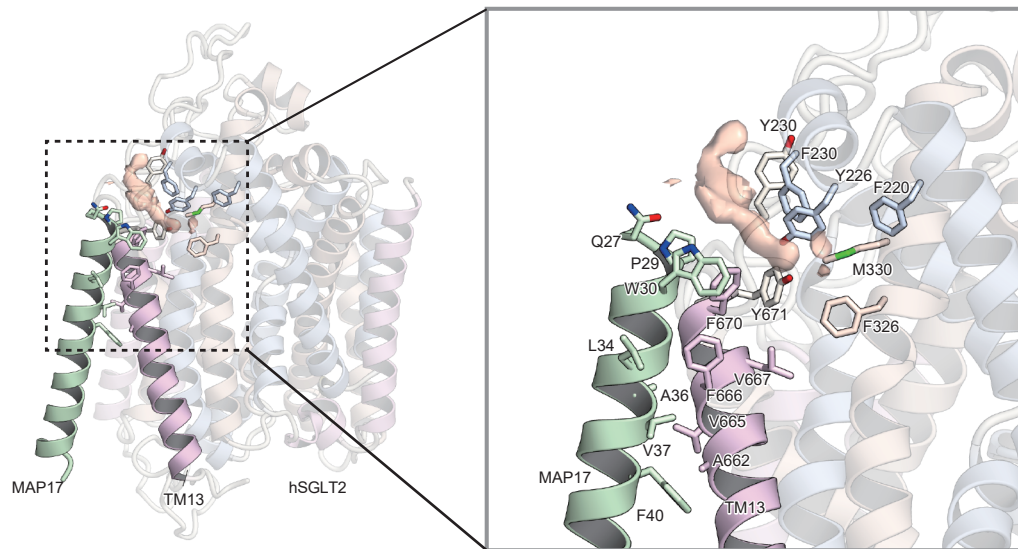

**Supplementary Figure 10. MAP17 and SGLT2 interaction site.**

The density of the lipid molecule (orange) is observed between MAP17 and SGLT2.

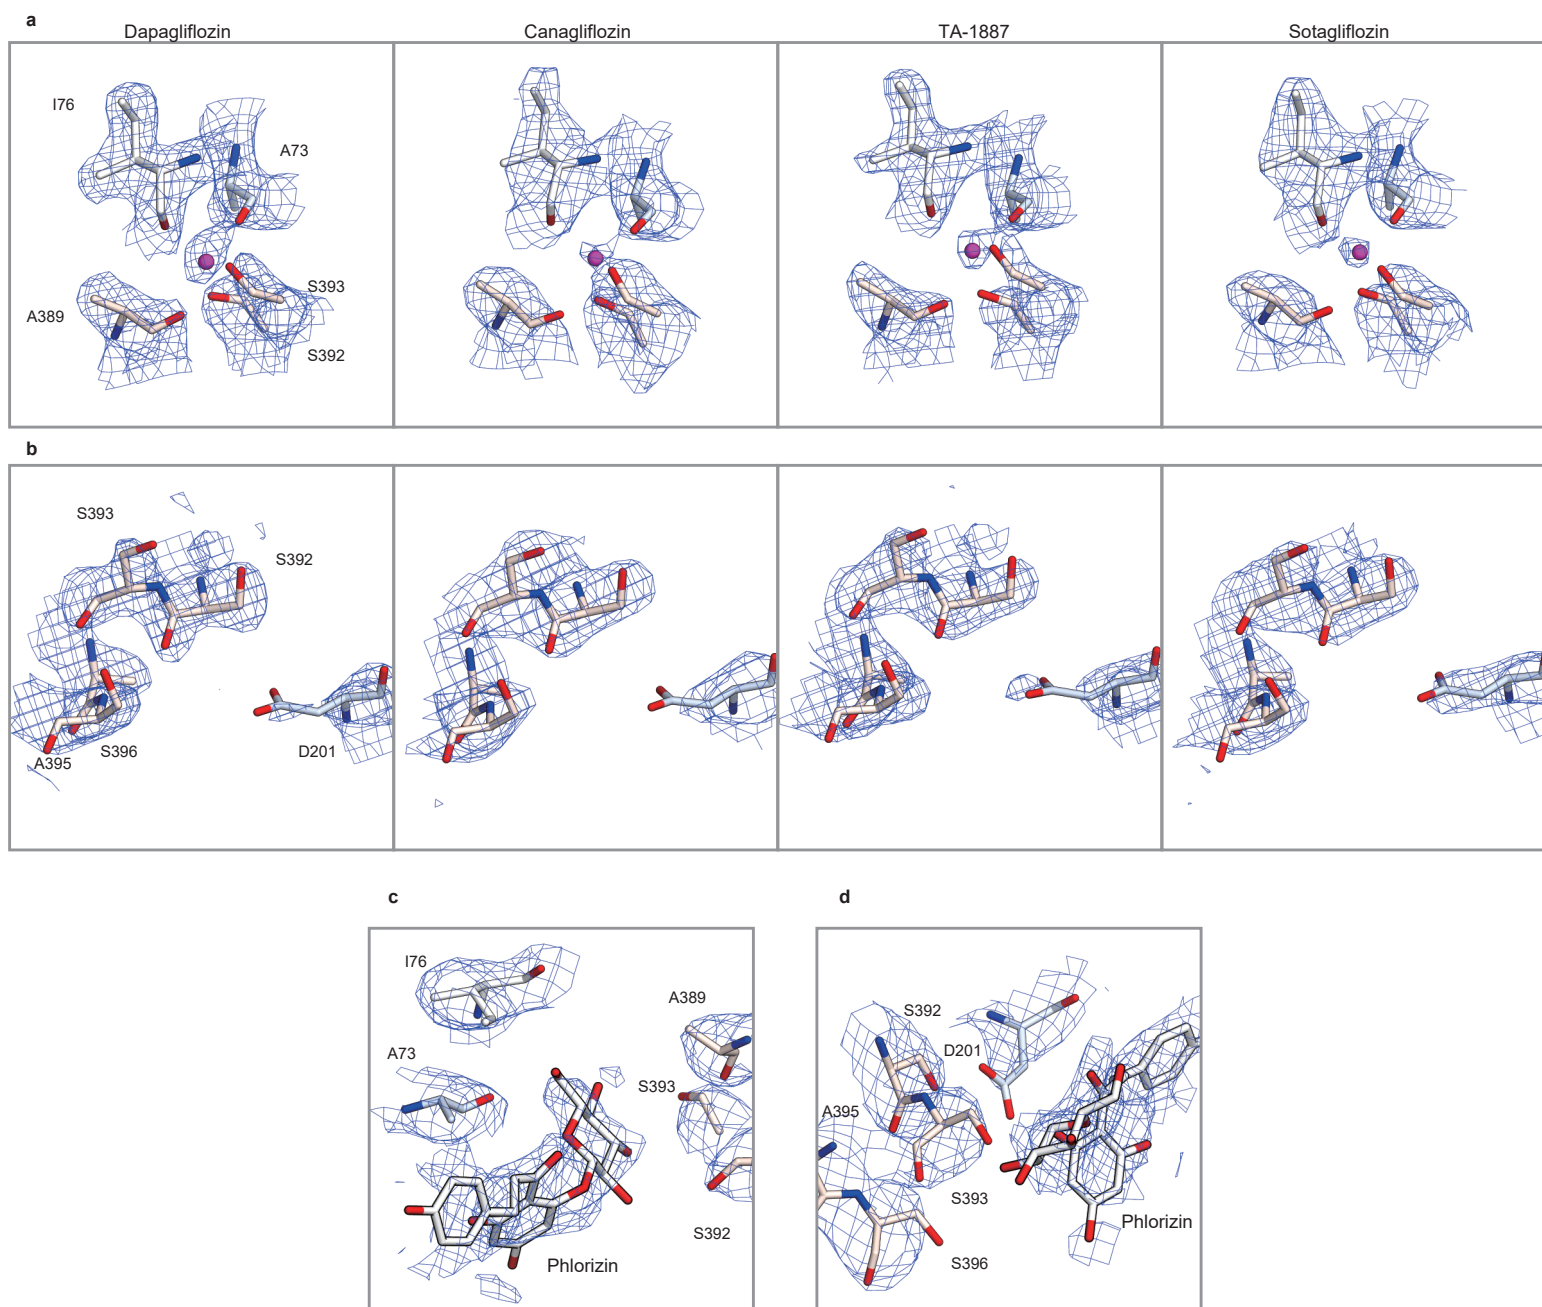

### Supplementary Figure 11. Sodium ion-binding sites of SGLT2

(a) The sodium ion-binding Na2 sites of dapagliflozin, canagliflozin, TA-1887, and sotagliflozin are shown. (b) Sites in SGLT2 corresponding to Na3 sites where the other sodium ion binds in SGLT1. No electron density corresponding to a sodium ion can be observed. (c, d) The sodium ion-binding Na2 sites, and the sites corresponding to Na3 sites of the phlorizin-bound inward-open conformation. The phlorizin binding site is near the Na2 and Na3 sites.

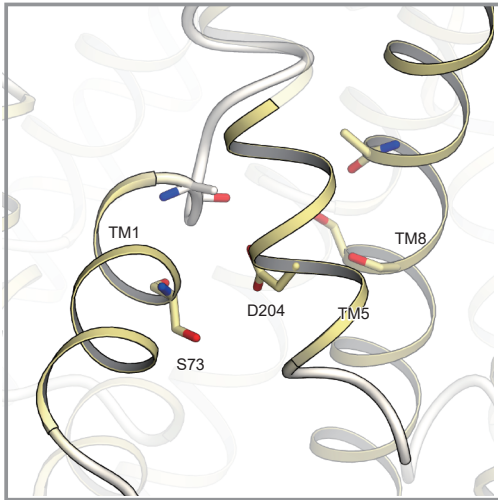

hSGLT1 (PDB : 7sla)

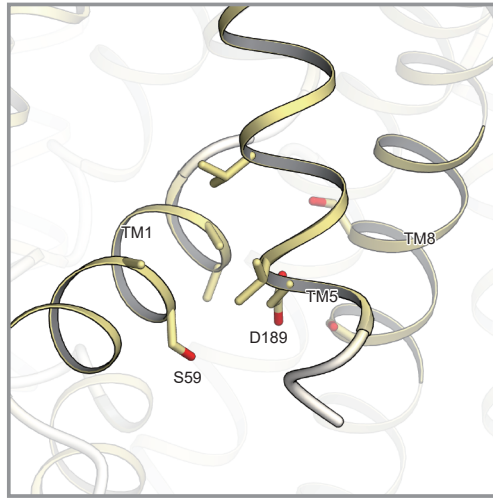

vSGLT (PDB : 3dh4)

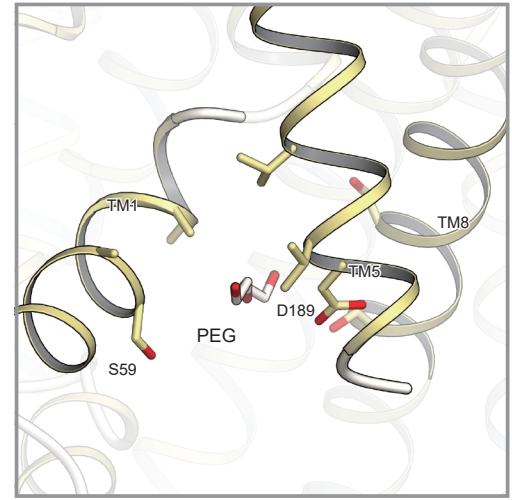

vSGLT (PDB : 2xq2)

**Supplementary Figure 12. Comparison of the inward conformation of other SGLT structures.**

Structural comparison of sites corresponding to the intracellular phlorizin-binding sites of SGLT2. From left to right, inward-occluded conformation of hSGLT1, inward-occluded conformation of vSGLT, and inward-open conformation of vSGLT. The structures are viewed from the membrane side.

**Supplementary Data Table 1.**

Data collection, processing, model refinement, and validation. Clash scores, rotamer outliers, and Ramachandran plots were calculated using the Servalcat pipeline.

| <b>Data collection and processing</b>               |                                               |                 |           |               |           |
|-----------------------------------------------------|-----------------------------------------------|-----------------|-----------|---------------|-----------|
| State                                               | Outward                                       | Outward         | Outward   | Outward       | Inward    |
| EMDB-ID                                             | EMD-34673                                     | EMD-34705       | EMD-34610 | EMD-34737     | EMD-34823 |
| PDB ID                                              | 8HDH                                          | 8HEZ            | 8HB0      | 8HG7          | 8HIN      |
| Inhibitor                                           | Canagliflozin                                 | Dapagliflozin   | TA-1887   | Sotagliflozin | Phlorizin |
| Microscope                                          | Titan Krios G4                                | Titan Krios G3i |           |               |           |
| Detector                                            | Gatan K3 Camera with Quantum LS energy filter |                 |           |               |           |
| Magnification                                       | 215,000                                       | 105,000         |           |               |           |
| Voltage (kV)                                        | 300                                           |                 |           |               |           |
| Electron exposure (e <sup>-</sup> /Å <sup>2</sup> ) | 64                                            |                 |           |               |           |
| Defocus range (μm)                                  | -0.6 to -1.6                                  | -0.8 to -1.6    |           |               |           |
| Pixel size (Å/px)                                   | 0.4                                           | 0.83            |           |               |           |
| Symmetry imposed                                    | C1                                            |                 |           |               |           |
| Number of movies                                    | 19,943                                        | 4,841           | 4,383     | 5,499         | 3,159     |
| Initial particle images                             | 2,364,108                                     | 3,692,950       | 3,395,470 | 5,242,427     | 3,013,029 |
| Final particle images                               | 65,919                                        | 197,695         | 103,853   | 72,773        | 76,485    |
| Map resolution (Å)                                  | 3.1                                           | 2.8             | 2.9       | 3.1           | 3.3       |
| FSC threshold                                       | 0.143                                         | 0.143           | 0.143     | 0.143         | 0.143     |
| Map sharpening B factor (Å <sup>2</sup> )           | -107.9                                        | -95.4           | -75.8     | -96.4         | -144.5    |
| <b>Model building and refinement</b>                |                                               |                 |           |               |           |
| Model composition                                   |                                               |                 |           |               |           |
| Protein atoms                                       | 4,728                                         | 4,692           | 4728      | 4,763         | 4,743     |
| Metals                                              | 1                                             | 1               | 1         | 1             | 0         |
| Other atoms                                         | 49                                            | 46              | 49        | 44            | 45        |
| R.M.S. deviations from ideal                        |                                               |                 |           |               |           |
| Bond lengths (Å)                                    | 0.011                                         | 0.012           | 0.012     | 0.015         | 0.018     |
| Bond angles (°)                                     | 1.876                                         | 1.859           | 1.943     | 2.010         | 2.368     |
| <b>Validation</b>                                   |                                               |                 |           |               |           |
| Clashscore                                          | 5.62                                          | 6.29            | 6.66      | 6.72          | 10.28     |
| Rotamer outliers (%)                                | 1.20                                          | 2.22            | 1.20      | 2.39          | 4.58      |
| Ramachandran plot                                   |                                               |                 |           |               |           |
| Favored (%)                                         | 95.9                                          | 97.4            | 95.7      | 96.1          | 92.9      |
| Allowed (%)                                         | 4.1                                           | 2.6             | 4.3       | 3.9           | 7.1       |
| Outlier (%)                                         | 0.0                                           | 0.0             | 0.0       | 0.0           | 0.0       |



**Supplementary Data Table 2.**

Kinetic parameters of canagliflozin binding in the membrane fraction of hSGLT2-expressing and MAP17-expressing cells, in the presence or absence of Na<sup>+</sup>.

|                  | Na(+)       | Na(-)      |
|------------------|-------------|------------|
| B <sub>max</sub> | 99.9 ± 8.5  | 69.3 ± 6.2 |
| K <sub>d</sub>   | 94.0 ± 21.7 | 109 ± 25.4 |

Data were represented in mean ± SEM (n = 3, technical replicates)

**Supplementary Data Table 3.**

Kinetic parameters of phlorizin and phloretin binding in the membrane fraction of wild-type cells or cells expressing mutated hSGLT2 and MAP17.

| Phlorizin |                         |                                        |                         |                                        |
|-----------|-------------------------|----------------------------------------|-------------------------|----------------------------------------|
| Construct | K <sub>d1</sub><br>(nM) | B <sub>max1</sub><br>(pmol/mg-protein) | K <sub>d2</sub><br>(nM) | B <sub>max2</sub><br>(pmol/mg-protein) |
| WT        | 28.1 ± 11.3             | 0.356 ± 0.069                          | 12400 ± 6900            | 16.8 ± 7.4                             |
| S74A      | 113 ± 16                | 1.16 ± 0.07                            | ND                      | ND                                     |
| D201      | 72.2 ± 10.0             | 0.550 ± 0.028                          | ND                      | ND                                     |
| F98A      | ND                      | ND                                     | ND                      | ND                                     |
| F453A     | ND                      | ND                                     | ND                      | ND                                     |

  

| Phloretin |                        |                                       |
|-----------|------------------------|---------------------------------------|
| Construct | K <sub>d</sub><br>(nM) | B <sub>max</sub><br>(pmol/mg-protein) |
| WT        | 12000 ± 1900           | 51.7 ± 3.46                           |
| S74A      | ND                     | ND                                    |
| D201      | ND                     | ND                                    |

Data were represented in mean ± SEM (n = 3, technical replicates)  
ND; not determined

**Supplementary Data Table 4.**

IC50 values of phlorizin in  $\alpha$ -MG uptake by wild-type and mutant hSGLT2.

| Construct | IC50 (nM)       |
|-----------|-----------------|
| WT        | 57.0 $\pm$ 8.49 |
| S74A      | 145 $\pm$ 27    |
| F98A      | 1640 $\pm$ 1720 |
| F453A     | 468 $\pm$ 200   |

Data were represented in mean  $\pm$  SEM (n = 4, biological replicates)
